# Supplementary material for: Transcriptomics Analysis Reveals Shared Pathways in Peripheral Blood Mononuclear Cells and Brain Tissues of Patients With Schizophrenia
Source: Front Psychiatry. 2021 Sep 22;12:716722. doi: 10.3389/fpsyt.2021.716722 (PMC8492981; doi:10.3389/fpsyt.2021.716722)
Supplement: Supplementary file 3 [file Table_1.XLSX]

## Sheet: Sup. table S1
Supplementary table 7 The clinicla characteristcs of GES80655 dataset
Variables	Patients with SCZ			HC
type of tissues	DLPFC	AnCg	nAcc	DLPFC	AnCg	nAcc
Ssmple size	22	11	13	16	15	18
Age (year)	42.73±10.31	39.27±8.00	45.15±13.15	48.50±11.76	50.40±11.67	48.50±12.51
Sex (M/F)	19/3	11/0	11/2	15/1	14/1	17/1
pH	6.86±0.17	6.90±0.19	6.79±0.19	6.95±0.10	6.95±0.09	6.93±0.12
Post Mortem Interval (hour)	21.24±9.59	21.42±9.89	21.78±6.82	20.81±7.09	21.70±5.24	23.29±6.05
Abbreviations: HC = health controls; SCZ = schizophrenia; DLPFC = dorsolateral prefrontal cortex; AnCg = anterior cingulate gyrus; nAcc = nucleus accumbent. Values were expressed as mean ± standard deviation.

## Sheet: Sup. table S2
SCZ (n = 10) vs. CON (n=20) for transcriptomics analysis							SCZ (n = 12) vs. CON (n=12) for qPCR validation
	Cohen's d	skewness (SCZ)	skewness (CON)	kurtosis (SCZ)	kurtosis (CON)			Cohen's d	skewness (SCZ)	skewness (CON)	kurtosis (SCZ)	kurtosis (CON)
Age	0.192133	0.947644	0.261655	2.8848	2.01041		Age	0.192133	0.21933	0.272696	1.62626	2.49709
BMI	0.0402783	0.183091	-2.82081	3.26208	11.8655		BMI	0.0402783	-0.205968	0.743322	2.40981	2.51969
							PLAAT3	0.986579	0.971237	0.732589	3.04097	2.37817
							PLAAT4	1.95186	0.841365	-0.473422	3.1983	3.21043
							PLD2	1.51373	0.786173	2.11949	3.07692	7.06344
							PLCB3	0.124733	0.218031	0.968763	1.88223	3.74729
							CHKA	0.467176	0.563809	2.50248	4.10251	8.24
							RPS29	1.93402	0.443614	-0.794544	2.04893	3.15961
							RPS27	0.0884467	-0.313735	-0.747201	2.25526	2.19409
							RPL9	0.292197	-0.335849	-0.0366182	2.27502	2.84695
							RPL24	0.799643	0.193324	-0.520467	2.246	1.87837
							RPL30	1.6754	-0.0330469	-0.842924	2.04016	2.57668
							RPL35	0.722066	-0.183585	-0.372827	2.46044	1.48412
							COX7C	1.35313	0.39263	0.309932	2.3842	1.93409
							COX7A2	1.12026	-0.271039	-0.538084	3.03709	2.47589
							NDUFAF2	1.45003	1.04134	1.68405	3.08381	5.01648
							NDUFA1	0.304496	0.816694	1.63071	2.5588	5.80764
							ATP5F1E	0.338835	-0.0292293	0.235278	2.52864	2.19553
							ATP5ME	1.52754	0.633442	-0.312837	3.37627	1.58887

## Sheet: Sup. table S3
DEGs in PBMCs
Ensembl	Names	logFC	logCPM	LR	p-value	FDR
ENSG00000237506	RPSAP15	-1.75751	3.4597	5.88371	0.0152816	0.146747
ENSG00000158050	DUSP2	-1.22812	6.52282	11.4383	0.000719449	0.0572411
ENSG00000168209	DDIT4	-1.08232	5.74206	9.87775	0.00167289	0.0819052
ENSG00000100376	FAM118A	-1.0458	6.24278	5.56837	0.0182878	0.154782
ENSG00000274012	RN7SL2	-0.910843	10.0715	6.9678	0.00829894	0.126001
ENSG00000283429	MIR1244-3	-0.909411	0.567213	8.72336	0.00314159	0.0948974
ENSG00000278771	RN7SL3	-0.893905	2.60672	6.87135	0.00875883	0.127533
ENSG00000180739	S1PR5	-0.861543	7.55302	9.73464	0.00180827	0.0822119
ENSG00000187118	CMC1	-0.825388	5.68359	10.265	0.00135579	0.0737658
ENSG00000213741	RPS29	-0.822923	9.34268	10.8933	0.000965153	0.065351
ENSG00000150687	PRSS23	-0.78674	5.40433	6.80933	0.00906827	0.128119
ENSG00000159674	SPON2	-0.781364	9.41251	6.50527	0.0107555	0.134233
ENSG00000171476	HOPX	-0.776656	5.93078	8.85485	0.00292311	0.0914199
ENSG00000067840	PDZD4	-0.747747	7.68092	14.1569	0.000168177	0.0410112
ENSG00000220749	RPL21P28	-0.740723	3.40289	4.74499	0.0293836	0.185964
ENSG00000186994	KANK3	-0.727676	3.1652	12.3305	0.000445605	0.0527342
ENSG00000007264	MATK	-0.71864	7.52399	12.2515	0.00046488	0.0527342
ENSG00000168824	NSG1	-0.703875	4.20941	6.26529	0.0123126	0.139494
ENSG00000069702	TGFBR3	-0.691044	6.09847	7.31148	0.00685155	0.118093
ENSG00000130522	JUND	-0.687358	9.05074	5.54447	0.0185392	0.15512
ENSG00000234268	AP000936.3	-0.683812	0.757129	4.5127	0.0336441	0.197369
ENSG00000233270	SNRPEP4	-0.670595	2.45541	14.3587	0.000151078	0.0410112
ENSG00000185885	IFITM1	-0.667103	7.05408	10.1665	0.00143015	0.0737658
ENSG00000239470	AC011979.1	-0.660918	0.856522	5.85387	0.0155428	0.14682
ENSG00000149294	NCAM1	-0.652658	5.07759	6.88252	0.00870429	0.127533
ENSG00000169715	MT1E	-0.649171	1.97011	4.55648	0.0327944	0.195409
ENSG00000231160	KLF3-AS1	-0.646946	5.7554	4.3221	0.0376204	0.206
ENSG00000132002	DNAJB1	-0.643787	6.97781	7.35899	0.00667284	0.116363
ENSG00000240376	AC010343.1	-0.641685	2.486	9.55909	0.00198962	0.0860655
ENSG00000143842	SOX13	-0.634835	4.13035	8.98667	0.00271956	0.0914199
ENSG00000104490	NCALD	-0.634071	4.46311	12.7394	0.000358038	0.0490842
ENSG00000265972	TXNIP	-0.629262	11.2366	15.3408	8.97558e-05	0.0369808
ENSG00000177954	RPS27	-0.6287	11.8409	8.67987	0.00321744	0.0952289
ENSG00000101665	SMAD7	-0.627501	5.4478	9.15764	0.00247681	0.0912438
ENSG00000116133	DHCR24	-0.616811	4.2252	12.1618	0.000487774	0.0527342
ENSG00000160932	LY6E	-0.61552	8.05776	6.00117	0.0142964	0.143762
ENSG00000145220	LYAR	-0.611291	5.8105	16.9739	3.78977e-05	0.0283156
ENSG00000115255	REEP6	-0.602448	2.3109	11.5965	0.000660766	0.0561958
ENSG00000227081	AC005912.1	-0.601135	6.78078	5.62093	0.0177473	0.153438
ENSG00000230311	TOMM20P4	-0.598412	0.634675	8.60324	0.00335565	0.0952289
ENSG00000179588	ZFPM1	-0.595918	6.21022	9.4206	0.00214561	0.0877045
ENSG00000163682	RPL9	-0.591727	9.87189	3.93064	0.0474138	0.227888
ENSG00000256393	RPL41P5	-0.591101	3.52187	9.22682	0.00238496	0.0906674
ENSG00000135362	PRR5L	-0.588908	6.10701	6.65888	0.0098663	0.130464
ENSG00000146677	AC004453.1	-0.588472	3.04027	7.00239	0.0081401	0.125731
ENSG00000008517	IL32	-0.588151	9.1066	8.42619	0.00369854	0.0969608
ENSG00000198846	TOX	-0.585748	3.63372	7.94769	0.00481488	0.108074
ENSG00000212664	AC064799.1	-0.585393	1.05619	4.60091	0.031955	0.193121
ENSG00000233913	RPL10P9	-0.578312	5.79133	4.27026	0.0387849	0.208653
ENSG00000145730	PAM	-0.576091	4.50617	20.0752	7.44547e-06	0.0165866
ENSG00000254682	AP002387.2	-0.574107	3.40046	6.95922	0.00833884	0.126036
ENSG00000181524	RPL24P4	-0.568811	2.32293	8.59638	0.00336831	0.0952289
ENSG00000145592	RPL37	-0.568488	10.7284	8.10802	0.00440699	0.105547
ENSG00000189067	LITAF	-0.566999	7.99849	18.0858	2.11166e-05	0.0268815
ENSG00000119138	KLF9	-0.566599	5.90294	7.29882	0.00689999	0.118209
ENSG00000142173	COL6A2	-0.565636	7.37064	4.5003	0.0338889	0.197504
ENSG00000197043	ANXA6	-0.559749	8.51505	23.6843	1.13503e-06	0.0101142
ENSG00000234287	AC099560.2	-0.558535	4.9825	4.44817	0.0349387	0.199832
ENSG00000244716	BX679664.3	-0.556464	5.52543	7.46354	0.00629611	0.114911
ENSG00000244398	AC116533.1	-0.55605	7.57607	7.09351	0.00773638	0.12367
ENSG00000224631	RPS27AP16	-0.555871	5.49894	5.72697	0.0167062	0.149476
ENSG00000242299	AC073861.1	-0.554204	5.4403	7.85345	0.00507238	0.110456
ENSG00000277972	CISD3	-0.552702	5.91248	15.7864	7.09088e-05	0.0369808
ENSG00000182899	RPL35A	-0.551956	10.3325	9.1587	0.00247539	0.0912438
ENSG00000133818	RRAS2	-0.55173	4.11872	11.5899	0.000663108	0.0561958
ENSG00000236801	RPL24P8	-0.550633	4.12909	6.15609	0.013096	0.141501
ENSG00000114391	RPL24	-0.5505	9.59451	7.46705	0.00628386	0.114911
ENSG00000188042	ARL4C	-0.550361	8.75572	11.3866	0.000739745	0.0583351
ENSG00000156482	RPL30	-0.546553	9.56602	7.17942	0.00737444	0.121692
ENSG00000188322	SBK1	-0.545453	6.56795	10.5677	0.00115083	0.0697623
ENSG00000141232	TOB1	-0.544844	5.53273	7.61191	0.0057984	0.113548
ENSG00000152518	ZFP36L2	-0.53958	9.52704	7.00238	0.00814015	0.125731
ENSG00000157514	TSC22D3	-0.539198	9.7465	6.62618	0.0100491	0.131599
ENSG00000142676	RPL11	-0.534339	10.6323	8.96339	0.00275443	0.0914199
ENSG00000170310	STX8	-0.533336	4.59363	19.0823	1.25203e-05	0.0185948
ENSG00000171858	RPS21	-0.53182	10.1341	8.28236	0.00400321	0.10077
ENSG00000186468	RPS23	-0.531692	8.39268	9.01964	0.00267095	0.0914199
ENSG00000204525	HLA-C	-0.531406	11.2927	7.84379	0.00509956	0.110456
ENSG00000170881	RNF139	-0.530992	5.30897	11.2793	0.000783757	0.0589196
ENSG00000227063	RPL41P1	-0.528542	4.64803	6.76879	0.00927657	0.129007
ENSG00000185920	PTCH1	-0.528391	5.45114	9.32463	0.00226093	0.089543
ENSG00000131469	RPL27	-0.525447	10.6232	7.72645	0.00544177	0.112512
ENSG00000185641	AC034236.1	-0.522894	5.98702	6.56918	0.010376	0.132804
ENSG00000176105	YES1	-0.522424	3.18808	6.15425	0.0131096	0.141501
ENSG00000268996	MAN1B1-DT	-0.522227	2.02735	15.0672	0.00010375	0.0369808
ENSG00000240065	PSMB9	-0.522202	7.79869	17.4962	2.87883e-05	0.0283156
ENSG00000152969	JAKMIP1	-0.520574	4.22017	4.84213	0.0277726	0.181262
ENSG00000075234	TTC38	-0.520236	6.82724	5.87112	0.0153912	0.14682
ENSG00000264281	AC016596.2	-0.519421	3.16758	5.4785	0.0192517	0.157243
ENSG00000240204	SMKR1	-0.518905	1.68013	7.35063	0.00670391	0.116677
ENSG00000127184	COX7C	-0.517547	8.52446	7.66636	0.005626	0.112913
ENSG00000133639	BTG1	-0.516924	8.77432	8.16668	0.0042667	0.103874
ENSG00000136942	RPL35	-0.51467	10.6579	7.75954	0.00534295	0.112026
ENSG00000101474	APMAP	-0.513767	7.70263	10.8368	0.000995	0.0656694
ENSG00000229117	RPL41	-0.513004	11.2617	8.08613	0.00446054	0.105712
ENSG00000078596	ITM2A	-0.512655	5.77855	4.44177	0.0350699	0.20008
ENSG00000126822	PLEKHG3	-0.512224	6.93935	10.2694	0.00135257	0.0737658
ENSG00000109475	RPL34	-0.512057	10.5393	5.883	0.0152878	0.146747
ENSG00000231500	RPS18	-0.511598	10.7206	7.60375	0.00582469	0.113548
ENSG00000225178	RPSAP58	-0.51122	4.51476	4.4116	0.0356953	0.201172
ENSG00000279483	AC090498.1	-0.509851	2.58609	5.51596	0.0188438	0.156202
ENSG00000071082	RPL31	-0.507784	11.1347	6.35375	0.0117134	0.137041
ENSG00000069275	NUCKS1	-0.507509	6.76881	15.0752	0.000103312	0.0369808
ENSG00000170860	LSM3	-0.505012	5.59169	10.6922	0.0010759	0.0684809
ENSG00000150938	CRIM1	-0.504152	3.61719	8.11342	0.00439389	0.105547
ENSG00000198918	RPL39	-0.503768	10.0913	6.61708	0.0101005	0.131599
ENSG00000165030	NFIL3	-0.503069	3.21417	3.86779	0.0492212	0.232192
ENSG00000198242	RPL23A	-0.502202	8.83186	8.5583	0.0034395	0.0952289
ENSG00000233205	AC108479.1	-0.500888	0.665381	6.67174	0.00979534	0.130464
ENSG00000100427	MLC1	-0.500287	5.24187	4.24805	0.0392954	0.209649
ENSG00000134049	IER3IP1	-0.500175	3.88986	11.0342	0.000894453	0.0645651
ENSG00000147604	RPL7	-0.499465	10.7405	5.98463	0.0144311	0.144327
ENSG00000244313	AC024293.1	-0.498993	5.66088	3.8887	0.0486121	0.230134
ENSG00000174173	TRMT10C	-0.498235	3.54212	9.07116	0.00259672	0.0914199
ENSG00000118181	RPS25	-0.496723	10.3536	7.20965	0.00725127	0.120778
ENSG00000123159	GIPC1	-0.496035	5.78228	8.81998	0.0029795	0.0921887
ENSG00000153814	JAZF1	-0.495961	5.16029	12.8067	0.000345378	0.0490699
ENSG00000021762	OSBPL5	-0.493476	7.23054	6.27704	0.0122312	0.139494
ENSG00000240036	AC104563.1	-0.490302	2.91786	4.30294	0.0380466	0.20635
ENSG00000156804	FBXO32	-0.487948	4.51979	8.66048	0.00325185	0.0952289
ENSG00000134954	ETS1	-0.487006	9.57048	6.31518	0.0119709	0.138264
ENSG00000164587	RPS14	-0.486144	10.827	7.10741	0.0076766	0.123254
ENSG00000197756	RPL37A	-0.485582	10.7792	8.65059	0.00326955	0.0952289
ENSG00000145425	RPS3A	-0.484268	10.4939	5.84616	0.0156111	0.146896
ENSG00000132718	SYT11	-0.483441	5.24388	9.30811	0.00228141	0.0899544
ENSG00000112695	COX7A2	-0.482672	6.11681	9.68234	0.00186047	0.0829933
ENSG00000142892	PIGK	-0.481855	4.37541	8.06336	0.00451693	0.106148
ENSG00000236439	AC099336.2	-0.481421	3.26336	4.4384	0.0351393	0.20008
ENSG00000235174	RPL39P3	-0.481315	8.61203	6.45067	0.011091	0.134832
ENSG00000126524	SBDS	-0.480044	4.95392	5.00711	0.0252435	0.174596
ENSG00000168028	RPSA	-0.47828	10.3829	5.15559	0.0231717	0.169126
ENSG00000162496	DHRS3	-0.477252	5.55457	6.76999	0.00927034	0.129007
ENSG00000149527	PLCH2	-0.476621	6.79335	5.37565	0.0204197	0.160636
ENSG00000234964	FABP5P7	-0.475808	-0.367964	4.81179	0.0282657	0.182919
ENSG00000118507	AKAP7	-0.475603	3.33939	9.00109	0.00269819	0.0914199
ENSG00000161970	RPL26	-0.475043	6.39198	6.07836	0.0136848	0.142912
ENSG00000174684	B4GAT1	-0.474193	2.98441	15.1631	9.86106e-05	0.0369808
ENSG00000257698	GIHCG	-0.472783	1.94306	8.25522	0.00406349	0.101999
ENSG00000146540	C7orf50	-0.472065	6.5271	13.6602	0.000219051	0.0416137
ENSG00000110108	TMEM109	-0.469437	6.43286	15.8866	6.72526e-05	0.0369808
ENSG00000111906	HDDC2	-0.467994	5.41066	11.995	0.000533427	0.0529964
ENSG00000110651	CD81	-0.46791	7.1935	11.675	0.00063346	0.0561958
ENSG00000135631	RAB11FIP5	-0.467841	4.39179	4.09469	0.0430182	0.217313
ENSG00000103202	NME4	-0.466857	5.55637	5.54459	0.0185379	0.15512
ENSG00000084072	PPIE	-0.466835	5.75992	7.77122	0.00530852	0.112026
ENSG00000186469	GNG2	-0.465924	7.36182	7.98627	0.00471335	0.107558
ENSG00000234171	RNASEH1-AS1	-0.465877	2.42053	7.38028	0.00659429	0.115219
ENSG00000122026	RPL21	-0.464329	9.67756	4.60065	0.0319598	0.193121
ENSG00000214485	RPL7P1	-0.464197	6.95341	5.85251	0.0155549	0.14682
ENSG00000230383	AC009245.1	-0.463294	3.68562	5.61684	0.0177887	0.153438
ENSG00000142541	RPL13A	-0.46173	12.3144	6.08558	0.013629	0.142712
ENSG00000144713	RPL32	-0.459596	10.2753	5.36398	0.0205568	0.160636
ENSG00000008988	RPS20	-0.459029	10.6884	5.292	0.0214236	0.16275
ENSG00000218283	MORF4L1P1	-0.457508	4.72628	9.38861	0.00218338	0.0881464
ENSG00000027075	PRKCH	-0.457484	7.17947	5.54943	0.0184867	0.154972
ENSG00000245910	SNHG6	-0.457285	7.64144	6.23482	0.0125262	0.139736
ENSG00000142534	RPS11	-0.457073	11.3012	8.46939	0.00361172	0.0969608
ENSG00000124172	ATP5F1E	-0.457052	8.42105	6.07688	0.0136962	0.142912
ENSG00000100319	ZMAT5	-0.457027	3.09996	9.84154	0.00170614	0.0819052
ENSG00000182004	SNRPE	-0.454707	5.66431	9.42792	0.00213707	0.0877045
ENSG00000173915	ATP5MD	-0.454653	5.9885	9.22906	0.00238204	0.0906674
ENSG00000196683	TOMM7	-0.454585	7.84039	4.39358	0.0360744	0.201796
ENSG00000137970	RPL7P9	-0.454527	6.62607	3.93257	0.0473594	0.227836
ENSG00000145982	FARS2	-0.453927	3.96887	7.63655	0.00571971	0.113279
ENSG00000100316	RPL3	-0.453661	11.7	6.45335	0.0110743	0.134832
ENSG00000156467	UQCRB	-0.451682	8.11205	6.67036	0.00980293	0.130464
ENSG00000125356	NDUFA1	-0.44974	5.86844	8.55772	0.0034406	0.0952289
ENSG00000163947	ARHGEF3	-0.448326	6.85484	9.70083	0.00184184	0.0828923
ENSG00000141736	ERBB2	-0.446857	5.4134	4.11632	0.0424714	0.215972
ENSG00000099385	BCL7C	-0.446149	5.56599	10.2161	0.0013922	0.0737658
ENSG00000236609	ZNF853	-0.445251	3.63061	4.45029	0.0348953	0.199832
ENSG00000184545	DUSP8	-0.443706	3.95006	4.11896	0.0424052	0.215972
ENSG00000007255	TRAPPC6A	-0.44272	5.71946	15.2087	9.62572e-05	0.0369808
ENSG00000164182	NDUFAF2	-0.442284	3.46401	8.55329	0.00344898	0.0952289
ENSG00000007402	CACNA2D2	-0.441519	5.16328	5.34515	0.02078	0.160958
ENSG00000131116	ZNF428	-0.441312	5.426	10.6206	0.00111838	0.06873
ENSG00000065675	PRKCQ	-0.439234	5.77313	6.36262	0.0116549	0.136787
ENSG00000166199	ALKBH3	-0.439122	3.58821	14.4543	0.000143604	0.0410112
ENSG00000117143	UAP1	-0.43904	4.28829	8.46461	0.00362122	0.0969608
ENSG00000139239	RPL14P1	-0.438308	3.8679	6.50999	0.010727	0.134065
ENSG00000178913	TAF7	-0.437224	6.59847	8.86299	0.0029101	0.0914199
ENSG00000115944	COX7A2L	-0.437125	6.15178	12.2389	0.000468032	0.0527342
ENSG00000160221	GATD3A	-0.436143	4.46958	4.04539	0.0442922	0.220619
ENSG00000133935	ERG28	-0.434706	4.08975	15.4206	8.60474e-05	0.0369808
ENSG00000154640	BTG3	-0.434576	2.66059	5.26682	0.0217357	0.16456
ENSG00000125691	RPL23	-0.434387	9.77613	5.81938	0.0158505	0.14758
ENSG00000139714	MORN3	-0.433935	3.41565	3.99327	0.0456824	0.224169
ENSG00000224543	SNRPGP15	-0.433463	0.848935	6.68452	0.00972536	0.130464
ENSG00000155368	DBI	-0.433457	6.07519	11.9485	0.00054691	0.0535551
ENSG00000166441	RPL27A	-0.433412	10.6779	8.54618	0.00346248	0.0952289
ENSG00000125743	SNRPD2	-0.431897	7.28852	8.01498	0.0046392	0.107098
ENSG00000171863	RPS7	-0.430553	9.47061	5.40894	0.0200339	0.159823
ENSG00000198034	RPS4X	-0.4301	10.7136	3.91464	0.0478674	0.228834
ENSG00000131378	RFTN1	-0.429498	6.38479	14.1621	0.000167712	0.0410112
ENSG00000145247	OCIAD2	-0.428306	4.90014	5.42611	0.0198379	0.159617
ENSG00000224858	RPL29P11	-0.42629	2.42647	4.33154	0.0374124	0.205901
ENSG00000163659	TIPARP	-0.425215	4.19546	4.97588	0.0257032	0.174953
ENSG00000127124	HIVEP3	-0.425109	5.07823	13.4113	0.00025011	0.0416137
ENSG00000139537	CCDC65	-0.424831	4.14412	7.57178	0.00592891	0.113548
ENSG00000088881	EBF4	-0.424521	4.17751	5.62074	0.0177492	0.153438
ENSG00000225194	LINC00092	-0.423563	2.22068	6.89684	0.00863483	0.127533
ENSG00000165502	RPL36AL	-0.423224	7.80694	8.98256	0.00272569	0.0914199
ENSG00000213178	RPL22P1	-0.422726	4.64287	4.04971	0.044179	0.220542
ENSG00000095794	CREM	-0.422347	4.19802	5.17417	0.0229251	0.168477
ENSG00000114942	EEF1B2	-0.422309	8.73927	4.87559	0.0272392	0.179799
ENSG00000213326	RPS7P11	-0.422074	4.32348	4.81182	0.0282652	0.182919
ENSG00000220472	AL139095.2	-0.421793	3.17085	5.41817	0.0199282	0.159617
ENSG00000213626	LBH	-0.421511	8.35855	6.42312	0.0112644	0.135192
ENSG00000263266	RPS7P1	-0.421478	6.384	4.90936	0.0267115	0.178163
ENSG00000136213	CHST12	-0.421324	7.11717	9.07288	0.00259429	0.0914199
ENSG00000134419	RPS15A	-0.421321	9.22564	4.17998	0.0409042	0.213032
ENSG00000105409	ATP1A3	-0.418992	4.05465	5.15078	0.0232359	0.16914
ENSG00000180992	MRPL14	-0.41844	5.12873	10.8737	0.000975388	0.065351
ENSG00000198133	TMEM229B	-0.417929	5.1832	8.68158	0.00321442	0.0952289
ENSG00000162244	RPL29	-0.416131	10.4922	6.21191	0.0126893	0.140117
ENSG00000090097	PCBP4	-0.415311	4.73192	7.44244	0.00637035	0.114911
ENSG00000176209	SMIM19	-0.415048	3.96902	10.9776	0.000922181	0.0651274
ENSG00000153015	CWC27	-0.414531	3.96998	12.3735	0.000435471	0.0527342
ENSG00000114779	ABHD14B	-0.414503	5.97854	8.94277	0.0027857	0.0914199
ENSG00000083845	RPS5	-0.414061	9.43417	6.40759	0.0113634	0.135192
ENSG00000129968	ABHD17A	-0.413741	10.1075	8.78867	0.00303108	0.0928176
ENSG00000111880	RNGTT	-0.413676	4.52363	8.55893	0.00343831	0.0952289
ENSG00000186654	PRR5	-0.413239	7.01807	6.75358	0.009356	0.129057
ENSG00000169020	ATP5ME	-0.412908	4.24426	6.62032	0.0100822	0.131599
ENSG00000112357	PEX7	-0.412495	1.84462	6.60179	0.0101876	0.132142
ENSG00000115738	ID2	-0.412023	7.21835	4.43025	0.0353074	0.200725
ENSG00000117362	APH1A	-0.412004	6.6741	14.0176	0.000181107	0.0410112
ENSG00000082458	DLG3	-0.411113	4.16858	8.55151	0.00345235	0.0952289
ENSG00000168899	VAMP5	-0.410814	6.0424	6.03097	0.014057	0.143672
ENSG00000235552	RPL6P27	-0.410354	7.33047	4.9932	0.0254471	0.174685
ENSG00000169612	RAMAC	-0.408661	2.34822	8.69512	0.00319063	0.0952289
ENSG00000116251	RPL22	-0.407328	9.73473	4.86059	0.0274769	0.1803
ENSG00000184752	NDUFA12	-0.405941	5.62833	8.10348	0.00441803	0.105547
ENSG00000175701	MTLN	-0.405787	4.59813	5.45783	0.0194808	0.158533
ENSG00000171791	BCL2	-0.404411	6.59875	4.81578	0.0282003	0.182892
ENSG00000133321	PLAAT4	-0.402754	6.63891	7.97303	0.00474794	0.107558
ENSG00000271601	LIX1L	-0.402562	5.77822	13.1892	0.000281561	0.0425253
ENSG00000126756	UXT	-0.402518	5.98753	7.82002	0.00516706	0.110456
ENSG00000001561	ENPP4	-0.402452	4.58017	4.41422	0.0356406	0.201172
ENSG00000198915	RASGEF1A	-0.401998	4.32911	5.33182	0.0209395	0.161321
ENSG00000178464	RPL10P16	-0.401881	7.07311	5.35733	0.0206353	0.160636
ENSG00000176485	PLAAT3	-0.400469	4.35889	6.3657	0.0116347	0.136777
ENSG00000124767	GLO1	-0.400195	5.44069	8.04891	0.0045531	0.10649
ENSG00000167074	TEF	-0.400144	3.69976	9.40538	0.00216349	0.0880314
ENSG00000198755	RPL10A	-0.399871	9.89367	5.80715	0.0159611	0.148307
ENSG00000196284	SUPT3H	-0.398536	3.10965	4.6868	0.0303951	0.189162
ENSG00000183291	SELENOF	-0.398497	6.96001	10.3578	0.0012893	0.0737658
ENSG00000163170	BOLA3	-0.397669	2.71541	5.25139	0.0219292	0.165183
ENSG00000167775	CD320	-0.397436	5.67742	5.35218	0.0206964	0.160693
ENSG00000232434	AJM1	-0.397229	5.75058	4.75215	0.0292617	0.185964
ENSG00000088179	PTPN4	-0.396052	6.30818	5.11432	0.0237291	0.170662
ENSG00000137876	RSL24D1	-0.395938	6.35196	6.40765	0.011363	0.135192
ENSG00000147224	PRPS1	-0.393528	5.27222	8.66085	0.0032512	0.0952289
ENSG00000129518	EAPP	-0.391904	4.85	11.5798	0.000666724	0.0561958
ENSG00000121851	POLR3GL	-0.391399	4.97162	9.82147	0.00172486	0.0819052
ENSG00000236552	RPL13AP5	-0.391261	6.94678	4.26551	0.0388936	0.208783
ENSG00000162385	MAGOH	-0.389611	4.96246	10.6355	0.00110939	0.06873
ENSG00000118680	MYL12B	-0.389484	7.78923	6.92919	0.00848	0.126811
ENSG00000226360	RPL10AP6	-0.389377	2.76993	4.04622	0.0442704	0.220619
ENSG00000184117	NIPSNAP1	-0.388881	4.88247	13.2988	0.000265577	0.04226
ENSG00000147419	CCDC25	-0.388819	4.72426	8.4429	0.00366472	0.0969608
ENSG00000132432	SEC61G	-0.388797	5.46671	6.8618	0.00880578	0.127591
ENSG00000136770	DNAJC1	-0.388378	4.68418	9.05155	0.00262472	0.0914199
ENSG00000102309	PIN4	-0.387062	4.5036	7.89298	0.00496269	0.110006
ENSG00000174917	MICOS13	-0.386565	5.78699	9.25483	0.00234876	0.0906674
ENSG00000109062	SLC9A3R1	-0.386235	8.66607	7.79932	0.00522659	0.111156
ENSG00000173456	RNF26	-0.385821	4.2804	12.0611	0.000514855	0.0527342
ENSG00000112306	RPS12	-0.385489	10.4449	4.27917	0.0385822	0.208269
ENSG00000089009	AC004086.1(RPL6)	-0.385171	10.7034	5.24051	0.0220667	0.165375
ENSG00000181163	NPM1	-0.384483	8.53242	5.58095	0.0181569	0.154782
ENSG00000105202	FBL	-0.384156	7.38996	6.27698	0.0122316	0.139494
ENSG00000198934	MAGEE1	-0.38384	2.97741	6.47992	0.01091	0.134726
ENSG00000166979	EVA1C	-0.383531	4.06015	4.25656	0.0390991	0.209073
ENSG00000090263	MRPS33	-0.382392	4.66911	9.12396	0.00252284	0.0914199
ENSG00000111962	UST	-0.38209	2.92374	7.59584	0.00585032	0.113548
ENSG00000100612	DHRS7	-0.381709	5.59008	6.48081	0.0109046	0.134726
ENSG00000176624	MEX3C	-0.381655	5.73427	6.41712	0.0113025	0.135192
ENSG00000182774	RPS17	-0.380982	9.83676	4.48013	0.0342911	0.198679
ENSG00000253683	AC027309.2	-0.380914	3.5063	8.62125	0.00332263	0.0952289
ENSG00000111276	CDKN1B	-0.380337	7.02395	6.14628	0.0131689	0.141501
ENSG00000111832	RWDD1	-0.38017	5.15674	7.07538	0.00781503	0.12367
ENSG00000133678	TMEM254	-0.38005	3.35654	16.3354	5.30644e-05	0.0363736
ENSG00000198937	CCDC167	-0.379027	4.10052	4.99689	0.0253929	0.174596
ENSG00000149273	RPS3	-0.37886	11.3852	4.83767	0.0278445	0.181376
ENSG00000171823	FBXL14	-0.378706	5.70184	4.26269	0.0389581	0.208878
ENSG00000172172	MRPL13	-0.378608	3.47415	9.6185	0.00192627	0.0840989
ENSG00000170540	ARL6IP1	-0.378578	6.38799	7.20257	0.00727993	0.121029
ENSG00000248124	RRN3P1	0.379597	5.70395	8.44135	0.00366784	0.0969608
ENSG00000173442	EHBP1L1	0.380079	9.15565	5.7755	0.0162511	0.148375
ENSG00000099326	MZF1	0.38061	6.3857	7.34045	0.00674198	0.117111
ENSG00000125454	SLC25A19	0.38081	3.45398	6.66289	0.00984413	0.130464
ENSG00000013375	PGM3	0.381016	3.96866	12.9396	0.000321709	0.0477791
ENSG00000128311	TST	0.382393	4.8542	6.20706	0.0127242	0.140328
ENSG00000243302	AC018638.4	0.382556	4.66705	4.75033	0.0292926	0.185964
ENSG00000073417	PDE8A	0.382825	4.89616	13.5228	0.000235679	0.0416137
ENSG00000145348	TBCK	0.382829	4.3811	11.3569	0.000751667	0.0587553
ENSG00000167280	ENGASE	0.383345	8.37118	4.24675	0.0393256	0.209649
ENSG00000167302	TEPSIN	0.384267	6.27762	7.16627	0.00742872	0.12191
ENSG00000110719	TCIRG1	0.384416	9.66518	4.30838	0.037925	0.206225
ENSG00000184402	SS18L1	0.384564	5.02232	12.1155	0.000500053	0.0527342
ENSG00000100429	HDAC10	0.385109	3.94931	5.83146	0.015742	0.147041
ENSG00000117616	RSRP1	0.385763	8.31025	9.72396	0.00181881	0.0822712
ENSG00000204859	ZBTB48	0.385789	6.1979	6.03765	0.0140039	0.143672
ENSG00000127415	IDUA	0.386598	6.78198	4.72585	0.0297125	0.186588
ENSG00000128245	YWHAH	0.386838	6.76308	6.96767	0.00829957	0.126001
ENSG00000105339	DENND3	0.387119	7.07179	4.39489	0.0360468	0.201796
ENSG00000173531	MST1	0.387987	3.61361	7.38833	0.00656485	0.115124
ENSG00000117385	P3H1	0.38883	6.06464	9.76804	0.00177572	0.0819052
ENSG00000135720	DYNC1LI2	0.388987	5.61844	4.72346	0.0297539	0.186598
ENSG00000005100	DHX33	0.389266	4.39375	9.20297	0.00241623	0.0908483
ENSG00000165699	TSC1	0.389681	6.28719	8.21391	0.00415706	0.102832
ENSG00000135912	TTLL4	0.391064	4.37371	4.05108	0.0441432	0.220542
ENSG00000279716	AC006128.1	0.39151	3.30366	5.96605	0.0145839	0.144945
ENSG00000169131	ZNF354A	0.393115	4.33333	13.6447	0.000220869	0.0416137
ENSG00000219200	RNASEK	0.39341	4.09238	4.25695	0.0390902	0.209073
ENSG00000068971	PPP2R5B	0.394028	5.40278	8.54724	0.00346047	0.0952289
ENSG00000213199	ASIC3	0.395191	3.1702	5.80536	0.0159774	0.148307
ENSG00000204149	AGAP6	0.396722	6.28724	7.54997	0.0060011	0.113548
ENSG00000111144	LTA4H	0.396732	7.1834	6.88791	0.00867805	0.127533
ENSG00000267121	AC008105.3	0.396739	6.62404	6.98262	0.00823048	0.125801
ENSG00000128872	TMOD2	0.400877	4.84811	4.46521	0.0345917	0.199513
ENSG00000227671	AL390728.4	0.401129	6.42933	6.83635	0.00893211	0.128119
ENSG00000234769	WASH4P	0.401606	3.05619	4.7737	0.0288977	0.18539
ENSG00000271533	Z83843.1	0.404087	3.66069	4.20463	0.0403138	0.211889
ENSG00000231113	AL035587.1	0.404605	3.36068	7.81938	0.00516889	0.110456
ENSG00000039319	ZFYVE16	0.405668	4.59309	6.42266	0.0112673	0.135192
ENSG00000160999	SH2B2	0.406	5.68477	4.49464	0.0340012	0.197979
ENSG00000109323	MANBA	0.40736	6.21254	5.55563	0.0184213	0.154817
ENSG00000270091	AC015726.1	0.408849	2.23301	4.84001	0.0278067	0.181262
ENSG00000281490	CICP14	0.409318	5.92212	5.15555	0.0231722	0.169126
ENSG00000229152	ANKRD10-IT1	0.410306	3.35088	6.10517	0.0134787	0.142478
ENSG00000074855	ANO8	0.411633	6.67479	8.88011	0.00288295	0.0914199
ENSG00000158467	AHCYL2	0.412293	3.97243	12.3179	0.000448635	0.0527342
ENSG00000188997	KCTD21	0.412969	2.97829	4.58231	0.0323036	0.194236
ENSG00000140400	MAN2C1	0.415113	7.88425	6.24857	0.0124294	0.139494
ENSG00000197608	ZNF841	0.416817	4.56318	8.01785	0.00463186	0.107098
ENSG00000102393	GLA	0.417318	4.49731	10.1754	0.00142331	0.0737658
ENSG00000204389	HSPA1A	0.419427	5.87171	4.85558	0.0275568	0.180494
ENSG00000198466	ZNF587	0.419508	4.67917	7.70358	0.00551113	0.112637
ENSG00000130449	ZSWIM6	0.419717	4.90584	4.94764	0.0261264	0.175973
ENSG00000106077	ABHD11	0.420213	4.21651	10.1222	0.00146493	0.074594
ENSG00000010295	IFFO1	0.420497	7.67314	4.66093	0.0308565	0.189545
ENSG00000178038	ALS2CL	0.421639	5.13112	4.7634	0.029071	0.185567
ENSG00000166888	STAT6	0.421732	9.23096	5.88595	0.0152622	0.146747
ENSG00000120458	MSANTD2	0.422593	4.74089	12.8625	0.000335241	0.0489726
ENSG00000113108	APBB3	0.423497	6.42566	6.14058	0.0132114	0.141561
ENSG00000228049	POLR2J2	0.424121	2.50858	5.69399	0.0170232	0.150409
ENSG00000279382	AC018665.1	0.425285	2.71673	4.9857	0.0255577	0.174685
ENSG00000167978	SRRM2	0.425394	10.8257	7.99713	0.00468516	0.107325
ENSG00000168769	TET2	0.426441	5.63966	5.6886	0.0170754	0.150653
ENSG00000124588	NQO2	0.426538	5.40878	7.09422	0.00773328	0.12367
ENSG00000168615	ADAM9	0.426933	3.92099	7.43439	0.0063989	0.115074
ENSG00000234420	ZNF37BP	0.428915	6.0485	10.2356	0.00137756	0.0737658
ENSG00000114770	ABCC5	0.429026	5.84532	13.4243	0.00024839	0.0416137
ENSG00000188234	AGAP4	0.42982	5.04699	8.61271	0.00333825	0.0952289
ENSG00000111752	PHC1	0.429856	5.74682	14.1614	0.00016778	0.0410112
ENSG00000100504	PYGL	0.43083	5.87541	5.81828	0.0158605	0.14758
ENSG00000073910	FRY	0.431193	4.62508	4.76686	0.0290127	0.185567
ENSG00000167065	DUSP18	0.433385	3.14906	5.32232	0.021054	0.161595
ENSG00000198520	ARMH1	0.434514	5.97866	4.73196	0.0296071	0.186395
ENSG00000183401	CCDC159	0.434664	6.28147	4.39527	0.0360388	0.201796
ENSG00000135655	USP15	0.435291	7.35142	9.01011	0.0026849	0.0914199
ENSG00000002016	RAD52	0.435385	4.24251	9.75412	0.00178922	0.0819052
ENSG00000167524	RSKR	0.437282	3.42609	5.72547	0.0167205	0.149476
ENSG00000165458	INPPL1	0.437552	8.30973	6.75216	0.00936341	0.129057
ENSG00000198876	DCAF12	0.438051	5.705	4.59966	0.0319783	0.193121
ENSG00000103042	SLC38A7	0.438757	4.36618	5.77772	0.0162306	0.148347
ENSG00000125149	C16orf70	0.439912	4.29247	7.4074	0.0064956	0.115074
ENSG00000196295	GARS-DT	0.440399	6.85998	5.60568	0.0179023	0.153817
ENSG00000039523	RIPOR1	0.440618	6.7874	5.1814	0.0228299	0.168408
ENSG00000231686	Z97180.1	0.442037	0.899081	7.14008	0.00753798	0.123242
ENSG00000108465	CDK5RAP3	0.442176	6.57095	7.22974	0.00717054	0.119881
ENSG00000142102	PGGHG	0.442929	9.59657	4.16594	0.0412446	0.213993
ENSG00000237441	RGL2	0.442986	7.47103	9.17973	0.0024471	0.0912438
ENSG00000140848	CPNE2	0.445943	4.7959	5.4428	0.0196492	0.159466
ENSG00000143457	GOLPH3L	0.446271	3.74238	12.6513	0.000375313	0.050673
ENSG00000186812	ZNF397	0.447012	5.33214	8.10554	0.00441301	0.105547
ENSG00000223959	AFG3L1P	0.44736	5.45571	10.9264	0.000948047	0.065351
ENSG00000143409	MINDY1	0.448815	5.76646	8.89624	0.00285758	0.0914199
ENSG00000176953	NFATC2IP	0.449609	6.94544	12.126	0.000497248	0.0527342
ENSG00000203667	COX20	0.449872	3.09771	9.81149	0.00173425	0.0819052
ENSG00000270804	AC010326.4	0.450964	1.50359	6.01981	0.0141462	0.143762
ENSG00000205593	DENND6B	0.452633	4.57158	6.28848	0.0121525	0.139494
ENSG00000215769	ARHGAP27P1-BPTFP1-KPNA2P3	0.455236	3.95595	7.44391	0.00636516	0.114911
ENSG00000196923	PDLIM7	0.455696	6.06127	7.92414	0.00487794	0.108941
ENSG00000158201	ABHD3	0.456489	5.59895	20.6949	5.38606e-06	0.0165866
ENSG00000116205	TCEANC2	0.457148	4.57792	11.457	0.000712237	0.0571778
ENSG00000131584	ACAP3	0.457767	8.18728	5.8335	0.0157238	0.147041
ENSG00000122547	EEPD1	0.459322	3.38603	5.052	0.0245976	0.172864
ENSG00000141068	KSR1	0.45953	6.16561	4.74546	0.0293756	0.185964
ENSG00000129219	PLD2	0.461282	5.69669	4.50156	0.033864	0.197504
ENSG00000178338	ZNF354B	0.462119	3.97434	14.2485	0.000160191	0.0410112
ENSG00000142252	GEMIN7	0.46564	4.27784	5.19775	0.0226162	0.167665
ENSG00000131069	ACSS2	0.467633	4.9658	8.08963	0.00445194	0.105712
ENSG00000120662	MTRF1	0.468078	4.64549	13.5686	0.000230004	0.0416137
ENSG00000164010	ERMAP	0.469754	3.67926	10.8909	0.000966401	0.065351
ENSG00000125459	MSTO1	0.469945	4.64054	6.94743	0.00839397	0.126036
ENSG00000146828	SLC12A9	0.470372	8.30397	6.80946	0.00906762	0.128119
ENSG00000166405	RIC3	0.471523	4.26315	8.35487	0.00384656	0.09878
ENSG00000225630	MTND2P28	0.472053	7.79823	3.89824	0.0483368	0.229722
ENSG00000198804	MT-CO1	0.472512	14.1069	7.12142	0.00761684	0.123242
ENSG00000250067	YJEFN3	0.473204	3.85289	5.87537	0.0153542	0.146804
ENSG00000169228	RAB24	0.473839	5.74424	4.48839	0.0341258	0.197979
ENSG00000101236	RNF24	0.474288	5.27278	11.9886	0.000535257	0.0529964
ENSG00000143624	INTS3	0.47546	6.22495	7.66689	0.00562432	0.112913
ENSG00000167701	GPT	0.475528	2.93917	4.42789	0.0353561	0.200725
ENSG00000131697	NPHP4	0.475832	4.75933	7.46586	0.006288	0.114911
ENSG00000188677	PARVB	0.476946	5.96779	4.48916	0.0341104	0.197979
ENSG00000169750	RAC3	0.477311	1.67497	5.49744	0.0190443	0.156843
ENSG00000111450	STX2	0.477786	5.72923	11.844	0.000578475	0.0555375
ENSG00000197162	ZNF785	0.478428	3.67041	7.93167	0.00485769	0.108761
ENSG00000124222	STX16	0.481518	7.6027	17.744	2.52709e-05	0.0281486
ENSG00000134030	CTIF	0.48167	4.51034	10.6972	0.00107297	0.0684809
ENSG00000164236	ANKRD33B	0.482417	4.14358	6.05452	0.0138707	0.143672
ENSG00000255284	AP006621.3	0.482946	2.83609	5.79629	0.01606	0.148323
ENSG00000130830	MPP1	0.483675	7.07523	7.86052	0.00505259	0.110456
ENSG00000149782	PLCB3	0.483779	5.34309	4.53593	0.0331905	0.196037
ENSG00000139117	CPNE8	0.487658	3.51725	5.35812	0.020626	0.160636
ENSG00000119139	TJP2	0.487726	4.98461	14.7297	0.000124078	0.0410112
ENSG00000196547	MAN2A2	0.488983	7.61163	12.09	0.000506931	0.0527342
ENSG00000205583	STAG3L1	0.489602	3.39486	5.32017	0.02108	0.161656
ENSG00000185946	RNPC3	0.489714	5.28865	5.877	0.01534	0.146804
ENSG00000064687	ABCA7	0.489781	8.94622	13.7144	0.000212819	0.0416137
ENSG00000274487	AC244154.1	0.490113	2.21534	9.28959	0.0023046	0.0904684
ENSG00000225234	TRAPPC12-AS1	0.490364	1.90747	4.00492	0.0453677	0.223328
ENSG00000064601	CTSA	0.491294	8.46495	6.48815	0.0108596	0.134726
ENSG00000150401	DCUN1D2	0.492099	4.51821	17.0825	3.57904e-05	0.0283156
ENSG00000186815	TPCN1	0.492142	6.8728	5.69319	0.0170309	0.150409
ENSG00000238058	AL355574.1	0.493319	-0.00563491	5.56249	0.0183492	0.154817
ENSG00000197063	MAFG	0.493716	4.98659	8.754	0.00308923	0.0939526
ENSG00000137841	PLCB2	0.493853	9.54733	6.88412	0.00869647	0.127533
ENSG00000018189	RUFY3	0.494574	5.14505	12.0631	0.000514299	0.0527342
ENSG00000198752	CDC42BPB	0.495126	4.23453	11.1891	0.000822774	0.0610978
ENSG00000230715	AC018638.2	0.498148	4.94615	8.19549	0.00419947	0.102832
ENSG00000232187	FTH1P7	0.501304	2.01331	4.90265	0.0268156	0.178724
ENSG00000188185	LINC00265	0.501645	3.37473	6.37851	0.0115511	0.136333
ENSG00000004660	CAMKK1	0.503651	4.73684	7.44759	0.00635214	0.114911
ENSG00000140995	DEF8	0.507432	7.46863	6.42342	0.0112625	0.135192
ENSG00000162616	DNAJB4	0.507887	2.77125	13.9869	0.000184093	0.0410112
ENSG00000105520	PLPPR2	0.509056	6.07312	4.32047	0.0376566	0.206
ENSG00000260244	AC104083.1	0.510402	2.53543	5.36146	0.0205865	0.160636
ENSG00000079277	MKNK1	0.515801	6.18875	11.487	0.000700862	0.0567762
ENSG00000118762	PKD2	0.51595	3.75805	14.1239	0.00017116	0.0410112
ENSG00000110721	CHKA	0.516017	3.59444	7.5289	0.0060717	0.113548
ENSG00000196411	EPHB4	0.516492	4.25901	7.40836	0.00649216	0.115074
ENSG00000163482	STK36	0.518694	4.35617	11.2858	0.000781005	0.0589196
ENSG00000261087	AP003469.4	0.521462	3.26621	7.42322	0.00643874	0.115074
ENSG00000082014	SMARCD3	0.528391	5.77351	4.54863	0.0329451	0.195409
ENSG00000162231	NXF1	0.528401	8.15705	12.0245	0.000525048	0.0529964
ENSG00000135722	FBXL8	0.528848	3.34783	10.1821	0.00141814	0.0737658
ENSG00000132535	DLG4	0.530607	4.9526	6.70383	0.0096206	0.130464
ENSG00000095066	HOOK2	0.533419	5.21995	11.2725	0.000786641	0.0589196
ENSG00000033627	ATP6V0A1	0.53443	5.48384	4.66251	0.0308281	0.189545
ENSG00000135473	PAN2	0.539434	6.64648	13.893	0.000193514	0.0410573
ENSG00000162572	SCNN1D	0.5395	4.77488	5.16304	0.0230725	0.16894
ENSG00000280237	MIR4697HG	0.547562	3.65849	8.84536	0.00293835	0.0914199
ENSG00000120889	TNFRSF10B	0.547991	6.29372	5.85595	0.0155244	0.14682
ENSG00000279413	AC112497.1	0.549704	1.11112	7.56987	0.00593521	0.113548
ENSG00000095383	TBC1D2	0.549891	5.31825	4.06378	0.0438124	0.219625
ENSG00000168010	ATG16L2	0.553554	8.81038	5.12961	0.023521	0.17013
ENSG00000212864	RNF208	0.55573	3.26771	4.15259	0.0415708	0.214126
ENSG00000065054	SLC9A3R2	0.556727	2.86526	8.58115	0.00339661	0.0952289
ENSG00000158062	UBXN11	0.557174	8.62729	4.31662	0.0377419	0.206077
ENSG00000232815	DUX4L50	0.559513	1.92159	4.15062	0.0416192	0.214251
ENSG00000269713	NBPF9	0.559931	4.55078	9.48597	0.00207049	0.0874415
ENSG00000270231	NBPF8	0.563009	4.90082	10.4453	0.00122962	0.0730475
ENSG00000114812	VIPR1	0.565745	5.62579	8.59863	0.00336416	0.0952289
ENSG00000258472	AC005726.1	0.571612	4.07847	7.72223	0.00545451	0.112512
ENSG00000266017	MIR4477B	0.572488	1.13189	4.6728	0.030644	0.189162
ENSG00000113916	BCL6	0.574579	5.84178	5.32979	0.0209639	0.161321
ENSG00000225697	SLC26A6	0.574783	5.76105	11.272	0.000786829	0.0589196
ENSG00000265298	AC132812.1	0.577488	3.89549	10.6671	0.00109058	0.06873
ENSG00000117480	FAAH	0.578769	4.85153	4.96398	0.0258806	0.175427
ENSG00000236017	ASMTL-AS1	0.582198	5.45731	4.31509	0.0377757	0.206136
ENSG00000204681	GABBR1	0.582873	7.78278	7.42509	0.00643205	0.115074
ENSG00000118985	ELL2	0.585549	3.94228	7.70769	0.00549861	0.112637
ENSG00000147894	C9orf72	0.587661	5.94112	5.85902	0.0154975	0.14682
ENSG00000139631	CSAD	0.58859	6.01207	10.5352	0.00117125	0.0701138
ENSG00000137198	GMPR	0.589258	5.27011	4.07953	0.0434057	0.218031
ENSG00000269867	AC010326.3	0.59165	1.86477	8.4932	0.00356476	0.0968462
ENSG00000133069	TMCC2	0.593198	4.78953	4.98314	0.0255955	0.174775
ENSG00000255200	PGAM1P8	0.599281	3.28312	3.93888	0.0471823	0.227326
ENSG00000082146	STRADB	0.602402	4.69929	4.72334	0.029756	0.186598
ENSG00000130222	GADD45G	0.605157	1.76399	4.02622	0.0447982	0.222123
ENSG00000134222	PSRC1	0.606002	2.98244	7.04607	0.00794392	0.124059
ENSG00000144026	ZNF514	0.607587	4.86336	10.1733	0.00142488	0.0737658
ENSG00000160113	NR2F6	0.608297	2.84746	11.8327	0.000581985	0.0555375
ENSG00000107551	RASSF4	0.614558	7.48462	4.28717	0.038401	0.207641
ENSG00000153885	KCTD15	0.615269	4.53795	5.05198	0.0245978	0.172864
ENSG00000264608	AC005726.3	0.617928	1.4907	6.92165	0.00851582	0.12692
ENSG00000196730	DAPK1	0.625443	5.63697	3.86336	0.0493515	0.232437
ENSG00000118515	SGK1	0.625906	4.91028	4.54423	0.0330299	0.195698
ENSG00000060138	YBX3	0.629944	6.97875	12.201	0.000477648	0.0527342
ENSG00000113810	SMC4	0.632921	4.6863	11.3148	0.000768903	0.0589196
ENSG00000260853	AC109460.2	0.64073	2.33882	8.28519	0.00399698	0.10077
ENSG00000182022	CHST15	0.641665	5.96748	4.53627	0.0331838	0.196037
ENSG00000108797	CNTNAP1	0.643419	3.55201	15.7257	7.32236e-05	0.0369808
ENSG00000263345	AC006435.2	0.645963	1.72568	8.52761	0.003498	0.095628
ENSG00000147454	SLC25A37	0.647282	7.2452	7.5648	0.00595194	0.113548
ENSG00000089041	P2RX7	0.647552	5.31566	5.19791	0.0226141	0.167665
ENSG00000117318	ID3	0.64771	3.35384	3.95699	0.0466772	0.226054
ENSG00000164530	PI16	0.658399	2.79009	7.76708	0.00532069	0.112026
ENSG00000215375	MYL5	0.663396	5.16504	5.96331	0.0146066	0.144945
ENSG00000115129	TP53I3	0.66507	3.90965	7.13358	0.00756537	0.123242
ENSG00000170448	NFXL1	0.66721	3.31067	15.6218	7.73557e-05	0.0369808
ENSG00000243716	NPIPB5	0.675701	7.24506	11.8204	0.000585852	0.0555375
ENSG00000051128	HOMER3	0.679178	4.71845	7.62764	0.00574806	0.113548
ENSG00000182871	COL18A1	0.683095	6.5239	5.4206	0.0199006	0.159617
ENSG00000102878	HSF4	0.686027	4.16205	8.39191	0.00376895	0.09849
ENSG00000196123	KIAA0895L	0.688151	4.11886	9.42211	0.00214385	0.0877045
ENSG00000139318	DUSP6	0.688892	6.83346	4.49209	0.034052	0.197979
ENSG00000013573	DDX11	0.690284	5.24536	3.92167	0.0476676	0.228738
ENSG00000210194	MT-TE	0.69226	2.03903	7.82842	0.00514311	0.110456
ENSG00000197355	UAP1L1	0.693895	6.14402	7.0662	0.00785517	0.12367
ENSG00000147459	DOCK5	0.703732	5.79286	5.88962	0.0152304	0.146747
ENSG00000111671	SPSB2	0.712345	5.14479	5.5844	0.0181211	0.15471
ENSG00000014914	MTMR11	0.728457	4.34365	5.85515	0.0155315	0.14682
ENSG00000238113	LINC01410	0.735026	4.31962	4.9635	0.0258878	0.175427
ENSG00000170345	FOS	0.742679	8.9532	4.59074	0.0321451	0.193675
ENSG00000170382	LRRN2	0.745268	3.75895	13.3803	0.000254288	0.0416137
ENSG00000276550	HERC2P2	0.752508	6.82359	20.4394	6.155e-06	0.0165866
ENSG00000135519	KCNH3	0.763518	4.44246	9.44921	0.0021124	0.0875801
ENSG00000163406	SLC15A2	0.773153	4.92902	10.6355	0.00110935	0.06873
ENSG00000173334	TRIB1	0.789632	4.29741	7.96415	0.00477129	0.107638
ENSG00000119535	CSF3R	0.810496	9.02398	4.05938	0.0439265	0.219904
ENSG00000107281	NPDC1	0.837467	5.12852	11.0418	0.000890823	0.0645651
ENSG00000181444	ZNF467	0.850319	6.30315	6.771	0.00926506	0.129007
ENSG00000168268	NT5DC2	0.853533	3.62074	11.0111	0.000905694	0.0645651
ENSG00000266714	MYO15B	0.872097	9.2212	14.3387	0.00015269	0.0410112
ENSG00000074660	SCARF1	0.886355	4.31328	6.71652	0.0095524	0.130464
ENSG00000196502	SULT1A1	0.89756	6.27141	11.6868	0.000629445	0.0561958
ENSG00000101335	MYL9	0.944612	7.57558	6.00358	0.0142769	0.143762
ENSG00000145335	SNCA	0.95789	6.00309	6.99643	0.00816725	0.125801
ENSG00000198853	RUSC2	1.0646	4.10376	9.61309	0.00193196	0.0840989
ENSG00000010327	STAB1	1.11684	8.74396	6.84155	0.00890615	0.128119
ENSG00000164403	SHROOM1	1.19636	4.39522	7.04483	0.00794944	0.124059
ENSG00000142552	RCN3	1.25582	6.48819	11.501	0.000695592	0.0567762
ENSG00000210135	MT-TN	1.26253	7.16425	8.02941	0.00460238	0.106802
ENSG00000106565	TMEM176B	1.27217	6.45031	6.16097	0.0130599	0.141501
ENSG00000197548	ATG7	1.39739	5.02969	13.3615	0.000256846	0.0416137
ENSG00000210144	MT-TY	1.4157	3.47125	14.2279	0.000161951	0.0410112
ENSG00000002933	TMEM176A	1.4174	4.82849	7.11704	0.00763547	0.123242
Abbreviations: FC = fold changes; FDR = false discovery rate

## Sheet: Sup. table S4
DEGs in DLPFC								DEGs in AnCg								DEGs in nAcc
Ensembl	Name	logFC	logCPM	LR	p-value	FDR		Ensembl	Name	logFC	logCPM	LR	p-value	FDR		Ensembl	Name	logFC	logCPM	LR	p-value	FDR
ENSG00000233476	EEF1A1P6	-0.483227	-0.251107	4.12476	0.0422601	1		ENSG00000214975	PPIAP29	-1.3658	-0.392507	9.65244	0.00189101	0.0664391		ENSG00000197971	MBP	0.843899	12.3777	7.27315	0.0069993	0.981517
ENSG00000126767	ELK1	0.506916	6.82392	9.16377	0.00246854	1		ENSG00000231389	HLA-DPA1	-0.846833	3.38593	7.32095	0.00681554	0.102427		ENSG00000123416	TUBA1B	0.453536	6.06447	4.30563	0.0379864	0.981517
ENSG00000142089	IFITM3	0.817002	5.4951	7.58973	0.00587017	1		ENSG00000196126	HLA-DRB1	-0.803328	3.41591	6.36872	0.0116149	0.122659		ENSG00000185883	ATP6V0C	0.574621	0.274115	4.67811	0.0305494	0.981517
ENSG00000214975	PPIAP29	-1.46022	-0.27139	11.4306	0.000722434	1		ENSG00000019582	CD74	-0.791534	6.46287	6.2025	0.012757	0.125189		ENSG00000115756	HPCAL1	0.618361	6.3302	4.21519	0.0400636	0.981517
ENSG00000120738	EGR1	-0.702385	7.59094	7.3521	0.00669846	1		ENSG00000204287	HLA-DRA	-0.714996	3.4746	3.84467	0.0499043	0.221595		ENSG00000061938	TNK2	0.617553	10.3105	4.1136	0.0425398	0.981517
ENSG00000229638	RPL4P4	0.506238	0.12112	7.84251	0.00510317	1		ENSG00000215790	SLC35E2	-0.622322	2.88396	10.1775	0.00142164	0.0659256		ENSG00000138834	MAPK8IP3	0.413954	10.317	4.56733	0.0325873	0.981517
ENSG00000123358	NR4A1	-1.06255	7.07495	16.1375	5.89046e-05	0.129762		ENSG00000065923	SLC9A7	-0.619763	4.5017	21.5886	3.37863e-06	0.00896296		ENSG00000106089	STX1A	0.66017	5.32504	5.93622	0.0148328	0.981517
ENSG00000137970	RPL7P9	0.681003	-1.73107	8.55115	0.00345303	1		ENSG00000162511	LAPTM5	-0.598884	4.19286	3.86226	0.0493838	0.221232		ENSG00000167553	TUBA1C	0.691607	2.01819	5.67782	0.0171807	0.981517
ENSG00000017483	SLC38A5	-0.428976	5.18609	8.01651	0.00463529	1		ENSG00000185164	NOMO2	-0.563952	4.61827	8.37135	0.00381183	0.080567		ENSG00000142634	EFHD2	0.833444	5.68858	7.76482	0.00532736	0.981517
ENSG00000172974	AC007318.1	0.5549	0.21075	24.3594	7.9935e-07	0.00404658		ENSG00000164506	STXBP5	-0.558064	6.23823	8.0627	0.00451859	0.0857069		ENSG00000105520	PLPPR2	0.455145	8.43836	4.76859	0.0289836	0.981517
ENSG00000187534	PRR13P5	0.481257	-0.381257	7.3139	0.00684231	1		ENSG00000110218	PANX1	-0.550472	4.25786	12.353	0.000440267	0.0439367		ENSG00000164880	INTS1	0.466071	8.80717	5.49545	0.019066	0.981517
ENSG00000110799	VWF	0.479022	7.96805	4.78639	0.0286856	1		ENSG00000067992	PDK3	-0.529824	4.15497	12.257	0.000463509	0.0457364		ENSG00000160781	PAQR6	0.539378	8.75915	5.65987	0.0173574	0.981517
ENSG00000139239	AC078814.1	0.440432	-0.882653	5.07234	0.0243106	1		ENSG00000114573	ATP6V1A	-0.512507	8.91934	7.59205	0.00586263	0.0969561		ENSG00000008710	PKD1	0.542005	9.63712	5.80543	0.0159768	0.981517
ENSG00000087074	PPP1R15A	-0.468599	5.72308	7.46715	0.00628348	1		ENSG00000137841	PLCB2	-0.51108	4.41654	6.24879	0.0124278	0.124216		ENSG00000105245	NUMBL	0.410138	7.10768	5.12194	0.0236252	0.981517
ENSG00000178464	RPL10P16	0.452253	-1.32171	6.06556	0.0137843	1		ENSG00000147416	ATP6V1B2	-0.509452	9.00524	7.65405	0.0056645	0.0956647		ENSG00000204389	HSPA1A	-0.494132	5.30678	4.8126	0.0282523	0.981517
ENSG00000242299	AC073861.1	0.394822	-0.227553	6.68956	0.00969794	1		ENSG00000105409	ATP1A3	-0.502251	11.5666	6.74134	0.00942038	0.113983		ENSG00000198517	MAFK	0.830439	4.07288	5.99182	0.0143724	0.981517
ENSG00000185885	IFITM1	0.857707	2.02913	5.6384	0.0175712	1		ENSG00000171617		-0.49911	10.433	6.2214	0.0126215	0.124669		ENSG00000125817	CENPB	0.419302	8.09626	4.64164	0.0312051	0.981517
ENSG00000185201	IFITM2	0.795646	3.55232	7.05724	0.00789456	1		ENSG00000138757	G3BP2	-0.495071	8.0542	6.72863	0.00948775	0.113983		ENSG00000123989	CHPF	0.405516	8.05724	4.08943	0.0431522	0.981517
ENSG00000167524	SGK494	0.410351	1.3437	7.24862	0.00709555	1		ENSG00000184613	NELL2	-0.487749	8.79156	5.32446	0.0210281	0.155584		ENSG00000210195	MT-TT	-0.965441	0.899702	9.19007	0.00243332	0.981517
ENSG00000154134	ROBO3	0.427969	5.01419	5.57489	0.0182199	1		ENSG00000139182	CLSTN3	-0.478977	10.0387	7.34569	0.00672238	0.102138		ENSG00000225138	SLC9A3-AS1	0.484085	5.30366	4.49612	0.0339719	0.981517
ENSG00000128692	EIF2S2P4	0.49954	-1.20322	6.05615	0.013858	1		ENSG00000109436	TBC1D9	-0.4774	6.74854	5.98423	0.0144344	0.132811		ENSG00000250251	PKD1P6	0.587794	4.95161	5.14532	0.0233092	0.981517
ENSG00000217930	PAM16	0.547975	1.37151	8.91295	0.00283156	1		ENSG00000213626	LBH	-0.470281	2.82384	6.99001	0.00819659	0.110913		ENSG00000177169	ULK1	0.510785	9.65333	4.91182	0.0266735	0.981517
ENSG00000224858	RPL29P11	0.576623	-1.55918	6.27688	0.0122324	1		ENSG00000104093	DMXL2	-0.46262	7.27173	6.40671	0.011369	0.122045		ENSG00000140564	FURIN	0.378726	6.94971	4.80304	0.0284096	0.981517
ENSG00000213626	LBH	-0.480474	2.9023	6.50986	0.0107278	1		ENSG00000073910	FRY	-0.459972	7.30705	10.0206	0.00154796	0.0659256		ENSG00000126705	AHDC1	0.458211	7.96115	6.02705	0.0140883	0.981517
ENSG00000231351	AC111200.2	0.670228	-2.69445	4.05102	0.0441446	1		ENSG00000198934	MAGEE1	-0.459215	6.80067	10.9479	0.000937086	0.0657848		ENSG00000137166	FOXP4	0.475983	6.82146	5.47013	0.0193442	0.981517
ENSG00000185834	RPL12P4	-0.78757	-2.99266	3.96341	0.0464994	1		ENSG00000137944	KYAT3	-0.456335	3.87145	5.88588	0.0152627	0.136633		ENSG00000179094	PER1	0.447885	7.5861	4.76909	0.0289752	0.981517
ENSG00000170345	FOS	-0.986208	6.39578	7.36481	0.00665125	1		ENSG00000047597	XK	-0.455968	4.75076	5.97837	0.0144824	0.132811		ENSG00000183458	AC138932.1	0.832075	4.67224	6.35266	0.0117205	0.981517
ENSG00000238083	LRRC37A2	0.584604	2.42844	5.75778	0.0164158	1		ENSG00000038002	AGA	-0.454073	3.15548	8.00107	0.00467497	0.0877256		ENSG00000264281	AC016596.1	0.834924	-1.80338	8.6538	0.00326381	0.981517
ENSG00000159388	BTG2	-0.510448	5.21032	5.3123	0.0211754	1		ENSG00000165943	MOAP1	-0.451953	8.13117	7.19951	0.00729235	0.105382		ENSG00000100304	TTLL12	0.400399	6.83391	4.96166	0.0259153	0.981517
ENSG00000106133	NSUN5P2	-0.689103	-1.56591	5.37344	0.0204456	1		ENSG00000162139	NEU3	-0.451232	3.42324	13.9961	0.000183188	0.037413		ENSG00000109906	ZBTB16	0.833222	5.5674	7.66193	0.00563982	0.981517
ENSG00000213347	MXD3	0.478955	2.36037	4.50163	0.0338625	1		ENSG00000170027	YWHAG	-0.450751	10.0914	9.09625	0.00256134	0.0716747		ENSG00000004399	PLXND1	0.499889	6.90688	7.63826	0.00571431	0.981517
ENSG00000230311	TOMM20P4	0.74387	-2.90851	4.76199	0.0290948	1		ENSG00000241973	PI4KA	-0.446448	10.3607	7.54321	0.00602367	0.0979628		ENSG00000206172	HBA1	0.907794	-0.522047	7.64363	0.00569731	0.981517
ENSG00000038002	AGA	-0.501605	2.92777	24.0854	9.21562e-07	0.00404658		ENSG00000178573	MAF	-0.445969	5.10943	6.61986	0.0100848	0.116994		ENSG00000128011	LRFN1	0.489431	5.12349	4.5955	0.032056	0.981517
ENSG00000010610	CD4	-0.418988	3.84113	10.4861	0.00120273	1		ENSG00000061918	GUCY1B3	-0.44386	7.5785	6.24597	0.0124476	0.124216		ENSG00000137501	SYTL2	0.63228	4.12524	5.14566	0.0233046	0.981517
ENSG00000070404	FSTL3	0.406411	4.27319	4.68159	0.0304875	1		ENSG00000029534	ANK1	-0.439067	5.59035	10.0413	0.00153072	0.0659256		ENSG00000142303	ADAMTS10	0.466349	5.67187	4.1176	0.0424393	0.981517
ENSG00000142102	PGGHG	0.751998	4.44681	7.67512	0.00559875	1		ENSG00000172575	RASGRP1	-0.438198	6.47516	4.9896	0.0255002	0.169228		ENSG00000021762	OSBPL5	0.424932	5.80834	4.8548	0.0275692	0.981517
ENSG00000125740	FOSB	-0.705814	4.74855	5.54993	0.0184814	1		ENSG00000112972	HMGCS1	-0.43795	7.17823	8.9852	0.00272175	0.0730363		ENSG00000146063	TRIM41	0.399685	6.96897	4.73751	0.0295117	0.981517
ENSG00000235776	AC000089.1	0.758974	-2.42711	7.58239	0.00589414	1		ENSG00000145349	CAMK2D	-0.435981	7.24614	8.08281	0.00446871	0.0853135		ENSG00000159733	ZFYVE28	0.379636	6.75118	4.99463	0.0254261	0.981517
ENSG00000182578	CSF1R	-0.45482	5.02953	4.03234	0.044636	1		ENSG00000105887	MTPN	-0.43354	7.06883	5.30052	0.0213191	0.15589		ENSG00000126464	PRR12	0.394867	7.51112	4.11459	0.0425147	0.981517
ENSG00000135722	FBXL8	0.465096	1.34759	4.66345	0.0308111	1		ENSG00000149177	PTPRJ	-0.43275	5.28357	10.743	0.00104674	0.0659256		ENSG00000136938	ANP32B	0.421737	5.62553	4.0141	0.0451213	0.981517
ENSG00000229939	AL589880.1	0.676394	-2.33729	4.69861	0.0301871	1		ENSG00000123643	SLC36A1	-0.432562	5.63325	7.53712	0.00604407	0.0981128		ENSG00000104267	CA2	-0.461924	5.98557	6.86865	0.00877209	0.981517
ENSG00000225234	TRAPPC12-AS1	0.431085	3.08931	6.95926	0.00833863	1		ENSG00000145882	PCYOX1L	-0.429768	5.31419	15.016	0.000106602	0.0334349		ENSG00000132386	SERPINF1	0.409685	2.86827	4.51931	0.0335143	0.981517
ENSG00000254701	AC138866.2	0.953287	-2.77253	7.16097	0.00745071	1		ENSG00000120053	GOT1	-0.429	8.3399	7.36251	0.00665978	0.102099		ENSG00000130702	LAMA5	0.516903	6.97167	4.48432	0.0342071	0.981517
ENSG00000250461	AC122718.1	-0.42839	1.0021	4.80244	0.0284194	1		ENSG00000104490	NCALD	-0.425203	7.901	5.7407	0.0165762	0.141922		ENSG00000170638	TRABD	0.386593	6.13242	4.56976	0.0325412	0.981517
ENSG00000138166	DUSP5	-0.48645	3.17213	7.76743	0.00531966	1		ENSG00000073969	NSF	-0.422881	9.15069	4.88653	0.0270671	0.171731		ENSG00000215030	AC073621.1	1.5628	1.48015	19.9833	7.81204e-06	0.0686054
ENSG00000225032	AL162586.1	0.494526	2.60655	5.20525	0.0225187	1		ENSG00000175054	ATR	-0.421612	4.84564	16.2665	5.5027e-05	0.0255034		ENSG00000105339	DENND3	0.474455	5.41451	7.39558	0.00653842	0.981517
ENSG00000231389	HLA-DPA1	-0.538491	3.61127	6.13246	0.0132722	1		ENSG00000198932	GPRASP1	-0.417595	8.22007	10.0811	0.001498	0.0659256		ENSG00000078596	ITM2A	-0.410773	4.94925	4.32783	0.037494	0.981517
ENSG00000197142	ACSL5	0.387295	3.51759	4.33907	0.0372473	1		ENSG00000145730	PAM	-0.417317	7.30852	8.74821	0.00309907	0.0751805		ENSG00000226084	AC113935.1	0.437847	-0.83945	4.40434	0.0358476	0.981517
ENSG00000133321	RARRES3	0.581955	1.78041	4.66524	0.030779	1		ENSG00000111371	SLC38A1	-0.416673	7.78392	5.5076	0.018934	0.149666		ENSG00000160284	SPATC1L	0.722815	4.76871	11.6907	0.000628118	0.981517
ENSG00000077238	IL4R	0.725445	4.20187	4.93345	0.0263417	1		ENSG00000141367	CLTC	-0.415075	9.45647	6.32034	0.011936	0.123184		ENSG00000130653	PNPLA7	0.548538	7.05225	4.88761	0.0270501	0.981517
ENSG00000204778	CBWD4P	-0.62926	-1.87779	4.91488	0.0266264	1		ENSG00000197043	ANXA6	-0.410987	8.47028	9.21384	0.00240192	0.0701361		ENSG00000204253	HNRNPCP2	-0.391424	1.94267	4.66296	0.03082	0.981517
								ENSG00000125827	TMX4	-0.410695	7.48846	6.89427	0.00864726	0.112187		ENSG00000106327	TFR2	0.518312	3.32093	6.16364	0.0130402	0.981517
								ENSG00000187189	TSPYL4	-0.408382	8.52901	8.53469	0.00348441	0.0780614		ENSG00000182871	COL18A1	0.548434	6.13286	4.57809	0.0323833	0.981517
								ENSG00000186469	GNG2	-0.405957	6.79904	5.35391	0.0206758	0.154626		ENSG00000165684	SNAPC4	0.476784	6.75303	4.96313	0.0258933	0.981517
								ENSG00000007168	PAFAH1B1	-0.405036	8.73824	5.57354	0.0182339	0.147178		ENSG00000158555	GDPD5	0.410193	5.95617	7.06892	0.00784326	0.981517
								ENSG00000159082	SYNJ1	-0.404974	8.36361	4.63537	0.0313194	0.183055		ENSG00000185201	IFITM2	0.593523	3.44477	3.97729	0.0461176	0.981517
								ENSG00000082458	DLG3	-0.401766	7.16957	8.21735	0.00414918	0.0822368		ENSG00000154134	ROBO3	0.45759	4.94212	4.70043	0.0301551	0.981517
								ENSG00000225975	LINC01534	-0.401374	1.92023	10.0524	0.00152151	0.0659256		ENSG00000218175	AC016739.1	0.760859	-1.47655	5.95664	0.0146619	0.981517
								ENSG00000151176	PLBD2	-0.400873	7.02271	10.1617	0.00143391	0.0659256		ENSG00000186174	BCL9L	0.401187	6.68822	4.15657	0.0414732	0.981517
								ENSG00000166411	IDH3A	-0.400063	5.21541	10.4065	0.00125574	0.0659256		ENSG00000139318	DUSP6	-0.478379	4.7541	5.61009	0.0178573	0.981517
								ENSG00000115419	GLS	-0.399806	8.36049	5.08851	0.0240848	0.1655		ENSG00000116741	RGS2	-0.434243	5.33706	5.0829	0.024163	0.981517
								ENSG00000011638	TMEM159	-0.3969	3.18937	6.69456	0.00967074	0.114768		ENSG00000095397	WHRN	0.462354	6.48483	6.76194	0.00931226	0.981517
								ENSG00000176994	SMCR8	-0.396164	4.05605	9.07053	0.00259762	0.0724201		ENSG00000105738	SIPA1L3	0.404642	6.48511	6.70985	0.00958818	0.981517
								ENSG00000177034	MTX3	-0.396018	4.49107	5.89792	0.0151587	0.13616		ENSG00000158050	DUSP2	-0.50786	3.40394	4.77368	0.028898	0.981517
								ENSG00000102900	NUP93	-0.39591	5.11094	23.4437	1.28625e-06	0.00896296		ENSG00000188566	NDOR1	0.451427	5.17706	4.52737	0.0333569	0.981517
								ENSG00000115828	QPCT	-0.393362	3.46109	10.5576	0.00115709	0.0659256		ENSG00000142694	EVA1B	0.745469	2.37762	4.8421	0.027773	0.981517
								ENSG00000111674	ENO2	-0.390018	10.2976	5.9413	0.0147901	0.133766		ENSG00000232024	LSM12P1	-0.478807	0.0377626	6.68914	0.00970019	0.981517
								ENSG00000113441	LNPEP	-0.389723	6.55589	6.35823	0.0116838	0.122659		ENSG00000143514	TP53BP2	-0.431692	6.99594	8.66108	0.00325078	0.981517
								ENSG00000196950	SLC39A10	-0.388179	7.92357	3.99037	0.045761	0.21502		ENSG00000026036	RTEL1-TNFRSF6B	0.694996	4.17345	5.91167	0.0150409	0.981517
								ENSG00000008869	HEATR5B	-0.38662	6.16385	9.80911	0.0017365	0.0664391		ENSG00000089639	GMIP	0.441715	3.87879	4.38856	0.0361808	0.981517
								ENSG00000169032	MAP2K1	-0.385066	7.92776	6.15281	0.0131203	0.126964		ENSG00000266145	AP001004.1	0.50809	1.42748	5.25669	0.0218626	0.981517
								ENSG00000169499	PLEKHA2	-0.385023	5.76383	8.63309	0.00330112	0.0769543		ENSG00000064932	SBNO2	0.450038	5.49381	4.58474	0.0322579	0.981517
								ENSG00000110344	UBE4A	-0.384798	5.87348	9.59193	0.00195435	0.0668584		ENSG00000142733	MAP3K6	0.638383	4.62902	6.85449	0.0088419	0.981517
								ENSG00000119401	TRIM32	-0.384713	4.7782	10.9862	0.000917937	0.0657848		ENSG00000068976	PYGM	-0.557946	6.06559	3.92941	0.0474487	0.981517
								ENSG00000253729	PRKDC	-0.38362	7.41197	12.6052	0.000384674	0.0405618		ENSG00000145217	SLC26A1	0.60005	3.89746	5.49611	0.0190588	0.981517
								ENSG00000197102	DYNC1H1	-0.382989	10.5325	9.6859	0.00185687	0.0664391		ENSG00000071967	CYBRD1	-0.431142	6.39039	4.86338	0.0274326	0.981517
								ENSG00000196305	IARS	-0.382212	7.16007	6.95838	0.00834274	0.111389		ENSG00000230715	AC018638.2	0.543842	2.7153	5.82831	0.0157703	0.981517
								ENSG00000181789	COPG1	-0.380952	7.59871	8.74134	0.00311076	0.0751805		ENSG00000119917	IFIT3	-0.433862	4.85395	7.03763	0.00798148	0.981517
								ENSG00000142197	DOPEY2	-0.380702	5.60951	13.3927	0.000252607	0.0395012		ENSG00000147144	CCDC120	0.447115	4.47109	5.16738	0.0230148	0.981517
								ENSG00000162636	FAM102B	-0.37999	6.46797	4.07355	0.0435597	0.209611		ENSG00000105327	BBC3	0.585085	2.27215	5.12796	0.0235433	0.981517
								ENSG00000138604	GLCE	-0.378905	5.19731	6.25858	0.0123593	0.124155		ENSG00000169047	IRS1	0.41978	5.35251	4.08695	0.0432156	0.981517
								ENSG00000155097	ATP6V1C1	-0.378894	8.25185	5.0871	0.0241044	0.1655		ENSG00000273253	AL022328.4	0.491067	3.30716	5.32121	0.0210674	0.981517
								ENSG00000106868	SUSD1	-0.378652	4.21761	9.94778	0.00161043	0.066088		ENSG00000011405	PIK3C2A	-0.523413	7.50611	7.24498	0.00710994	0.981517
								ENSG00000140497	SCAMP2	0.378553	4.59756	5.2393	0.0220822	0.158307		ENSG00000105656	ELL	0.412055	5.2059	4.24902	0.039273	0.981517
								ENSG00000129925	TMEM8A	0.378694	6.32147	4.92982	0.0263971	0.170771		ENSG00000137944	KYAT3	-0.403406	3.56197	5.74794	0.016508	0.981517
								ENSG00000110090	CPT1A	0.378811	5.66668	7.80714	0.00520403	0.0923568		ENSG00000244879	GABPB1-AS1	0.454679	3.50078	12.0457	0.000519119	0.981517
								ENSG00000101849	TBL1X	0.379111	5.1223	7.60769	0.005812	0.0969561		ENSG00000228716	DHFR	0.390776	3.41494	6.02227	0.0141265	0.981517
								ENSG00000235043	TECRP1	0.37929	0.919411	5.46738	0.0193747	0.150175		ENSG00000196843	ARID5A	0.430391	4.12309	4.31525	0.0377722	0.981517
								ENSG00000047230	CTPS2	0.380469	3.16126	7.33026	0.00678031	0.102427		ENSG00000229939	AL589880.1	0.699325	-1.85608	6.14219	0.0131994	0.981517
								ENSG00000125457	MIF4GD	0.380569	3.53812	9.69207	0.00185065	0.0664391		ENSG00000182378	PLCXD1	-0.604514	6.29018	8.13634	0.00433868	0.981517
								ENSG00000101605	MYOM1	0.380716	4.04237	5.98603	0.0144196	0.132811		ENSG00000205702	CYP2D7	0.489963	2.51209	4.84416	0.0277399	0.981517
								ENSG00000157181	C1orf27	0.381215	4.57446	6.311	0.0119991	0.123184		ENSG00000235316	DUSP8P5	0.450195	2.5659	8.58595	0.00338766	0.981517
								ENSG00000104218	CSPP1	0.381906	5.1088	7.35093	0.00670281	0.102138		ENSG00000163110	PDLIM5	-0.42397	6.84835	9.27008	0.00232927	0.981517
								ENSG00000132329	RAMP1	0.382499	4.73336	5.48989	0.0191267	0.15009		ENSG00000236801	RPL24P8	-0.549851	-1.70477	4.60305	0.0319151	0.981517
								ENSG00000164111	ANXA5	0.382643	5.608	7.49842	0.00617531	0.099187		ENSG00000183682	BMP8A	0.451845	2.18227	7.09226	0.00774176	0.981517
								ENSG00000225697	SLC26A6	0.383573	3.96117	4.38905	0.0361704	0.193364		ENSG00000168517	HEXIM2	0.385698	1.57101	5.48697	0.0191587	0.981517
								ENSG00000104885	DOT1L	0.383918	5.42675	4.95397	0.0260309	0.170218		ENSG00000186792	HYAL3	0.409187	2.63902	5.59013	0.0180619	0.981517
								ENSG00000120915	EPHX2	0.384393	3.63006	6.50587	0.0107519	0.119523		ENSG00000129667	RHBDF2	0.461045	4.3987	4.07751	0.0434576	0.981517
								ENSG00000198840	MT-ND3	0.38494	9.65436	4.71047	0.0299794	0.179958		ENSG00000207554	MIR647	0.632879	0.641389	5.51155	0.0188913	0.981517
								ENSG00000144677	CTDSPL	0.385029	5.94173	9.48998	0.00206598	0.0678548		ENSG00000231389	HLA-DPA1	-0.684575	4.11301	5.41546	0.0199592	0.981517
								ENSG00000180098	TRNAU1AP	0.385389	3.8475	6.13212	0.0132748	0.127039		ENSG00000163406	SLC15A2	-0.413193	5.60404	3.9313	0.0473954	0.981517
								ENSG00000105519	CAPS	0.386536	3.34058	4.5598	0.0327308	0.18619		ENSG00000249565	SERBP1P5	-0.751867	-1.85435	6.93593	0.00844811	0.981517
								ENSG00000116754	SRSF11	0.386751	7.31766	10.6543	0.00109816	0.0659256		ENSG00000186470	BTN3A2	-0.544904	3.66798	4.83981	0.02781	0.981517
								ENSG00000134152	KATNBL1	0.386991	4.37805	7.35571	0.00668501	0.102138		ENSG00000254911	SCARNA9	-0.4192	0.656369	4.11182	0.0425845	0.981517
								ENSG00000042286	AIFM2	0.387489	3.60013	5.57736	0.0181941	0.147178
								ENSG00000140398	NEIL1	0.387687	5.46281	5.11193	0.0237618	0.164183
								ENSG00000130303	BST2	0.387827	2.95081	4.09818	0.0429294	0.208521
								ENSG00000169738	DCXR	0.388033	5.44135	6.90399	0.00860038	0.112187
								ENSG00000168710	AHCYL1	0.388204	8.57194	5.51646	0.0188384	0.149178
								ENSG00000164181	ELOVL7	0.388429	4.45667	7.11403	0.00764829	0.107001
								ENSG00000006756	ARSD	0.3886	3.31809	6.01408	0.0141922	0.13203
								ENSG00000089048	ESF1	0.388654	5.32184	10.6753	0.00108575	0.0659256
								ENSG00000177954	RPS27	0.388997	4.48725	9.3662	0.00221023	0.0685875
								ENSG00000186350	RXRA	0.389032	7.43033	5.92882	0.0148952	0.134439
								ENSG00000187514	PTMA	0.389919	6.84098	7.01882	0.00806573	0.110339
								ENSG00000167393	PPP2R3B	0.390607	4.63083	5.0776	0.0242369	0.165512
								ENSG00000135205	CCDC146	0.39071	3.14248	9.14519	0.00249373	0.0712991
								ENSG00000241852	C8orf58	0.391102	1.72154	8.41123	0.00372911	0.0803625
								ENSG00000239697	TNFSF12	0.391681	4.73622	9.12426	0.00252241	0.0714575
								ENSG00000272655	POLR2J4	0.39195	1.33082	5.69705	0.0169935	0.143773
								ENSG00000233901	LINC01503	0.392553	1.89351	4.52553	0.0333928	0.187503
								ENSG00000083444	PLOD1	0.392756	6.57428	5.98304	0.0144441	0.132811
								ENSG00000172819	RARG	0.392956	3.59518	7.56496	0.00595141	0.0975012
								ENSG00000115325	DOK1	0.393204	2.27198	4.35555	0.0368886	0.195154
								ENSG00000245849	RAD51-AS1	0.393265	2.57017	5.16412	0.0230581	0.161765
								ENSG00000250067	YJEFN3	0.393621	4.14369	4.56095	0.0327089	0.18619
								ENSG00000078061	ARAF	0.393845	4.68958	8.579	0.00340063	0.0774527
								ENSG00000116017	ARID3A	0.393859	3.50057	6.35057	0.0117343	0.122659
								ENSG00000168890	TMEM150A	0.393959	3.54766	6.49492	0.0108183	0.119983
								ENSG00000164104	HMGB2	0.394408	3.35643	8.28269	0.00400248	0.0818753
								ENSG00000167173	C15orf39	0.395184	3.83053	5.54805	0.0185013	0.147708
								ENSG00000173653	RCE1	0.395852	3.74217	7.65704	0.00565514	0.0956647
								ENSG00000158411	MITD1	0.396325	2.87368	6.46753	0.0109863	0.1204
								ENSG00000168385	44441	0.397106	7.72475	6.18462	0.0128865	0.125884
								ENSG00000164414	SLC35A1	0.398088	2.43705	8.17298	0.00425189	0.0826158
								ENSG00000186654	PRR5	0.398149	4.22342	4.66868	0.0307176	0.181658
								ENSG00000159079	C21orf59	0.398368	2.67354	6.81487	0.0090402	0.113022
								ENSG00000055070	SZRD1	0.398827	4.79796	10.2402	0.00137411	0.0659256
								ENSG00000047644	WWC3	0.398927	5.26799	5.32728	0.0209942	0.155584
								ENSG00000110011	DNAJC4	0.399119	4.33167	10.3807	0.00127337	0.0659256
								ENSG00000204264	PSMB8	0.399401	2.38858	5.74318	0.0165528	0.141922
								ENSG00000179134	SAMD4B	0.399701	8.42505	10.7935	0.00101855	0.0659256
								ENSG00000255284	AP006621.3	0.399727	2.34036	3.92866	0.0474698	0.217921
								ENSG00000141971	MVB12A	0.400211	3.46961	6.833	0.00894887	0.112753
								ENSG00000261512	AC092368.3	0.400437	0.0115345	5.15707	0.0231519	0.162172
								ENSG00000130429	ARPC1B	0.400767	2.93552	5.31288	0.0211683	0.155584
								ENSG00000132781	MUTYH	0.400926	3.68629	6.64138	0.0099637	0.116203
								ENSG00000177119	ANO6	0.401356	4.1214	5.26902	0.0217082	0.157527
								ENSG00000033030	ZCCHC8	0.402633	3.55283	7.18414	0.00735507	0.106063
								ENSG00000140450	ARRDC4	0.4028	4.72411	7.12914	0.00758412	0.106582
								ENSG00000204435	CSNK2B	0.403058	1.57647	5.41419	0.0199737	0.151793
								ENSG00000182378	PLCXD1	0.403618	6.49752	6.01794	0.0141611	0.13193
								ENSG00000170919	TPT1-AS1	0.405045	3.94186	6.40408	0.0113859	0.122045
								ENSG00000180376	CCDC66	0.405244	4.30815	6.34518	0.0117701	0.122659
								ENSG00000147454	SLC25A37	0.40567	4.58841	12.2057	0.000476447	0.0459798
								ENSG00000071564	TCF3	0.407016	5.4196	5.90073	0.0151346	0.13616
								ENSG00000264608	AC005726.4	0.407466	2.17672	4.83817	0.0278364	0.173252
								ENSG00000166508	MCM7	0.4083	5.83463	4.77655	0.0288499	0.175721
								ENSG00000091409	ITGA6	0.4083	5.3239	6.26647	0.0123044	0.124155
								ENSG00000196576	PLXNB2	0.408641	7.28011	4.33281	0.0373844	0.196123
								ENSG00000246451	AL049840.1	0.409034	3.17274	5.68797	0.0170816	0.144079
								ENSG00000164687	FABP5	0.409913	2.05168	6.35621	0.0116971	0.122659
								ENSG00000213722	DDAH2	0.410325	4.95179	6.40269	0.0113948	0.122045
								ENSG00000137275	RIPK1	0.410632	3.98423	6.89196	0.00865842	0.112187
								ENSG00000105483	CARD8	0.41085	3.76365	8.03484	0.00458861	0.0864747
								ENSG00000160796	NBEAL2	0.411956	5.2309	5.01698	0.0250999	0.169039
								ENSG00000119632	IFI27L2	0.412211	3.2279	5.28824	0.0214699	0.156213
								ENSG00000178927	C17orf62	0.412338	5.82195	5.89738	0.0151634	0.13616
								ENSG00000184481	FOXO4	0.412502	6.55605	5.59282	0.0180342	0.147178
								ENSG00000187049	TMEM216	0.413547	2.55768	6.3562	0.0116972	0.122659
								ENSG00000175309	PHYKPL	0.414365	5.76773	5.70691	0.0168982	0.143382
								ENSG00000118418	HMGN3	0.415775	3.92294	14.2141	0.000163146	0.0354039
								ENSG00000261556	SMG1P7	0.416754	2.22995	4.21878	0.0399789	0.20205
								ENSG00000013441	CLK1	0.416905	5.81557	5.33217	0.0209353	0.155584
								ENSG00000171044	XKR6	0.417328	3.82518	7.12887	0.00758526	0.106582
								ENSG00000130517	PGPEP1	0.417414	6.02109	10.3862	0.00126958	0.0659256
								ENSG00000129347	KRI1	0.417442	4.75903	10.3645	0.00128464	0.0659256
								ENSG00000162959	MEMO1	0.417957	3.19597	9.86906	0.00168081	0.0661426
								ENSG00000104936	DMPK	0.418012	6.54091	4.87897	0.0271858	0.171731
								ENSG00000143458	GABPB2	0.418454	4.84967	10.4655	0.00121628	0.0659256
								ENSG00000198324	FAM109A	0.418504	3.83012	6.73329	0.00946297	0.113983
								ENSG00000126653	NSRP1	0.418504	5.58739	8.99902	0.00270124	0.0727679
								ENSG00000165092	ALDH1A1	0.418776	4.89636	5.2376	0.0221038	0.158332
								ENSG00000177917	ARL6IP6	0.418862	3.24919	6.5379	0.01056	0.118138
								ENSG00000011451	WIZ	0.41892	7.47679	6.73528	0.00945242	0.113983
								ENSG00000072818	ACAP1	0.418932	3.57157	4.81986	0.0281336	0.174361
								ENSG00000184489	PTP4A3	0.419096	4.88818	6.15995	0.0130675	0.126805
								ENSG00000027075	PRKCH	0.419128	3.23996	5.081	0.0241894	0.1655
								ENSG00000102125	TAZ	0.41916	5.23913	5.24332	0.0220312	0.158307
								ENSG00000105329	TGFB1	0.419375	4.43303	3.96211	0.0465353	0.215659
								ENSG00000074416	MGLL	0.420252	8.86049	13.4733	0.000241982	0.0395012
								ENSG00000095066	HOOK2	0.420402	5.26409	6.12858	0.0133014	0.127039
								ENSG00000145220	LYAR	0.421693	2.1787	7.43403	0.0064002	0.100369
								ENSG00000119471	HSDL2	0.421946	5.0971	7.60726	0.00581338	0.0969561
								ENSG00000071655	MBD3	0.421976	6.99336	8.39134	0.00377014	0.0803625
								ENSG00000138496	PARP9	0.422225	3.51334	4.09885	0.0429123	0.208521
								ENSG00000198417	MT1F	0.422329	1.62981	4.14636	0.041724	0.206971
								ENSG00000093010	COMT	0.423838	6.29976	6.93179	0.0084677	0.111993
								ENSG00000125753	VASP	0.424264	3.54494	4.69807	0.0301965	0.180398
								ENSG00000142327	RNPEPL1	0.425016	6.10735	7.72628	0.00544226	0.0943705
								ENSG00000143842	SOX13	0.425085	5.24103	8.44119	0.00366817	0.0803625
								ENSG00000134954	ETS1	0.426283	4.76202	5.08767	0.0240966	0.1655
								ENSG00000132819	RBM38	0.426321	4.30813	11.8806	0.000567223	0.0512483
								ENSG00000145012	LPP	0.42653	6.31787	5.28881	0.0214629	0.156213
								ENSG00000108961	RANGRF	0.42739	-0.822585	5.17122	0.022964	0.161595
								ENSG00000206190	ATP10A	0.427461	5.28387	4.69359	0.0302754	0.180493
								ENSG00000175215	CTDSP2	0.427683	7.18842	10.9443	0.000938911	0.0657848
								ENSG00000100441	KHNYN	0.427757	4.60027	5.59596	0.018002	0.147178
								ENSG00000182873	PRKCZ-AS1	0.428623	3.32159	4.42802	0.0353535	0.192007
								ENSG00000123143	PKN1	0.4287	7.64081	4.44859	0.0349301	0.191065
								ENSG00000173531	MST1	0.428948	3.26271	5.71841	0.0167879	0.142722
								ENSG00000148672	GLUD1	0.429002	8.27944	6.74324	0.00941037	0.113983
								ENSG00000205534	SMG1P2	0.429108	0.119707	4.16439	0.0412823	0.206042
								ENSG00000177732	SOX12	0.429306	5.55096	5.05734	0.0245219	0.166406
								ENSG00000087086	FTL	0.429472	8.4323	6.99288	0.00818344	0.110913
								ENSG00000125817	CENPB	0.429556	7.60871	4.39753	0.0359911	0.193237
								ENSG00000175611	LINC00476	0.43054	3.02416	7.42692	0.00642553	0.100586
								ENSG00000163702	IL17RC	0.431146	4.81824	7.24206	0.00712153	0.104409
								ENSG00000151466	SCLT1	0.431155	3.84901	4.03591	0.0445416	0.21147
								ENSG00000182685	BRICD5	0.432265	4.29062	4.50445	0.0338068	0.188989
								ENSG00000206341	HLA-H	0.433303	2.12003	4.35636	0.0368711	0.195154
								ENSG00000034152	MAP2K3	0.43404	4.21457	8.72324	0.0031418	0.0751805
								ENSG00000156858	PRR14	0.434079	4.8343	7.43645	0.00639158	0.100369
								ENSG00000103811	CTSH	0.435799	4.81298	4.10469	0.0427645	0.208455
								ENSG00000164610	RP9	0.436669	2.28023	8.84025	0.00294658	0.0751805
								ENSG00000243646	IL10RB	0.437305	2.59373	6.73061	0.00947723	0.113983
								ENSG00000115257	PCSK4	0.43779	3.94394	3.97122	0.0462843	0.215348
								ENSG00000076604	TRAF4	0.438293	4.74776	4.86564	0.0273966	0.172041
								ENSG00000244879	GABPB1-AS1	0.438415	3.1863	4.31339	0.0378136	0.196963
								ENSG00000156313	RPGR	0.439013	3.28156	7.27648	0.00698635	0.103664
								ENSG00000173473	SMARCC1	0.439585	6.0043	6.30043	0.0120709	0.123184
								ENSG00000172366	MCRIP2	0.44049	4.25045	4.98797	0.0255242	0.169228
								ENSG00000177706	FAM20C	0.440786	5.72509	6.91615	0.00854206	0.112187
								ENSG00000167930	FAM234A	0.440923	5.38812	8.19085	0.00421023	0.0825318
								ENSG00000120306	CYSTM1	0.440938	4.70223	14.4633	0.000142918	0.0354039
								ENSG00000205544	TMEM256	0.4413	-0.707557	5.37824	0.0203895	0.153689
								ENSG00000236871	LINC00106	0.441466	2.28365	3.91769	0.0477804	0.217978
								ENSG00000128311	TST	0.441619	3.65256	4.4021	0.0358947	0.193154
								ENSG00000126870	WDR60	0.442083	5.90046	9.71334	0.00182935	0.0664391
								ENSG00000130304	SLC27A1	0.442273	6.81797	4.2705	0.0387794	0.199299
								ENSG00000108639	SYNGR2	0.442286	5.29226	3.9792	0.0460654	0.215348
								ENSG00000176845	METRNL	0.442396	3.60321	5.16384	0.0230619	0.161765
								ENSG00000172164	SNTB1	0.443793	3.38581	5.49761	0.0190424	0.149983
								ENSG00000148411	NACC2	0.444522	8.10002	5.3318	0.0209397	0.155584
								ENSG00000100075	SLC25A1	0.44475	5.67781	8.73653	0.00311898	0.0751805
								ENSG00000163820	FYCO1	0.444787	5.01737	8.29938	0.00396587	0.0817565
								ENSG00000046651	OFD1	0.445007	4.2907	10.518	0.00118219	0.0659256
								ENSG00000157379	DHRS1	0.445551	3.61311	21.3201	3.88641e-06	0.00896296
								ENSG00000153944	MSI2	0.445603	6.57979	6.50619	0.01075	0.119523
								ENSG00000113732	ATP6V0E1	0.447012	3.87799	8.43333	0.00368405	0.0803625
								ENSG00000213199	ASIC3	0.447383	4.63946	6.15603	0.0130965	0.126947
								ENSG00000205763	RP9P	0.447771	3.92659	10.6383	0.00110772	0.0659256
								ENSG00000128309	MPST	0.447773	4.19919	4.52956	0.0333141	0.187301
								ENSG00000067066	SP100	0.448235	3.29297	6.62756	0.0100412	0.116736
								ENSG00000021300	PLEKHB1	0.448723	9.60891	4.66601	0.0307653	0.181817
								ENSG00000130066	SAT1	0.448885	5.86034	6.88945	0.00867057	0.112187
								ENSG00000137198	GMPR	0.448992	2.5092	4.783	0.028742	0.175721
								ENSG00000197321	SVIL	0.44918	4.64151	7.10291	0.00769589	0.107108
								ENSG00000132950	ZMYM5	0.449809	4.07947	6.44199	0.0111454	0.12054
								ENSG00000233476	EEF1A1P6	0.449894	-0.385625	4.99321	0.0254469	0.169228
								ENSG00000158201	ABHD3	0.451553	3.10106	5.7021	0.0169446	0.143532
								ENSG00000173511	VEGFB	0.451651	6.27039	6.77453	0.00924678	0.113574
								ENSG00000204525	HLA-C	0.451723	6.60718	4.72286	0.0297642	0.178911
								ENSG00000232112	TMA7	0.452358	3.09467	10.1659	0.00143059	0.0659256
								ENSG00000089041	P2RX7	0.452501	5.70009	4.60649	0.0318512	0.184271
								ENSG00000132541	RIDA	0.453406	4.2419	10.54	0.00116816	0.0659256
								ENSG00000180900	SCRIB	0.454866	7.68781	3.95991	0.0465963	0.215827
								ENSG00000183688	RFLNB	0.455184	3.27162	5.58045	0.0181621	0.147178
								ENSG00000185591	SP1	0.455394	5.23304	7.16316	0.0074416	0.106378
								ENSG00000122986	HVCN1	0.45542	1.72819	4.36986	0.0365801	0.194695
								ENSG00000108854	SMURF2	0.455717	4.74839	7.22459	0.00719117	0.10508
								ENSG00000144579	CTDSP1	0.456121	5.36029	7.50366	0.00615736	0.099187
								ENSG00000042493	CAPG	0.45613	3.27927	4.84504	0.0277257	0.172809
								ENSG00000116478	HDAC1	0.457482	4.26815	9.41817	0.00214846	0.068477
								ENSG00000178935	ZNF552	0.457561	2.33615	6.55779	0.0104426	0.117875
								ENSG00000196696	PDXDC2P-NPIPB14P	0.457858	1.70056	4.80021	0.0284563	0.175124
								ENSG00000258839	MC1R	0.458252	2.46245	7.59423	0.00585556	0.0969561
								ENSG00000129353	SLC44A2	0.458404	7.47045	8.14173	0.00432581	0.0833098
								ENSG00000160307	S100B	0.459138	7.04292	4.33885	0.037252	0.196097
								ENSG00000206573	THUMPD3-AS1	0.459157	3.8417	8.67713	0.00322228	0.0760701
								ENSG00000157600	TMEM164	0.459208	4.91237	9.76745	0.00177629	0.0664391
								ENSG00000204592	HLA-E	0.460027	7.84265	6.98434	0.00822261	0.110914
								ENSG00000173442	EHBP1L1	0.460052	4.72517	5.75843	0.0164097	0.141922
								ENSG00000124570	SERPINB6	0.460053	4.97277	8.33362	0.00389179	0.0807332
								ENSG00000100319	ZMAT5	0.460155	2.08796	13.2008	0.000279835	0.0395012
								ENSG00000106397	PLOD3	0.461083	5.98899	4.28515	0.0384467	0.198611
								ENSG00000136518	ACTL6A	0.462435	2.64224	8.57502	0.00340806	0.0774527
								ENSG00000100906	NFKBIA	0.463742	5.29023	4.32319	0.0375964	0.196648
								ENSG00000178685	PARP10	0.46535	5.02798	4.53869	0.0331369	0.186769
								ENSG00000121691	CAT	0.465361	4.4757	5.64657	0.0174896	0.14583
								ENSG00000157191	NECAP2	0.466205	4.21696	8.72455	0.00313953	0.0751805
								ENSG00000117298	ECE1	0.466265	6.53756	9.65211	0.00189134	0.0664391
								ENSG00000176531	PHLDB3	0.466556	2.90455	8.70391	0.00317529	0.0755701
								ENSG00000068079	IFI35	0.467179	2.37039	7.02358	0.00804434	0.110339
								ENSG00000233016	SNHG7	0.46735	4.04801	5.58305	0.0181351	0.147178
								ENSG00000160325	CACFD1	0.467418	5.37347	8.8018	0.00300933	0.0751805
								ENSG00000128228	SDF2L1	0.467701	2.07519	8.78038	0.00304488	0.0751805
								ENSG00000028137	TNFRSF1B	0.467895	3.99061	6.87491	0.00874142	0.112187
								ENSG00000225855	RUSC1-AS1	0.468033	2.7928	6.30895	0.012013	0.123184
								ENSG00000203896	LIME1	0.468624	3.3944	3.89769	0.0483525	0.21905
								ENSG00000156381	ANKRD9	0.468729	5.23797	4.78944	0.0286347	0.175721
								ENSG00000176105	YES1	0.469398	4.27101	10.1089	0.00147558	0.0659256
								ENSG00000198816	ZNF358	0.469573	6.19042	15.5951	7.84572e-05	0.0271584
								ENSG00000220842	RPL21P16	0.469729	-0.756519	3.86995	0.0491579	0.220708
								ENSG00000163565	IFI16	0.470183	3.95297	4.08045	0.043382	0.209356
								ENSG00000130669	PAK4	0.470498	5.86023	4.62614	0.0314882	0.183254
								ENSG00000107829	FBXW4	0.47055	7.26427	9.90562	0.00164774	0.0661426
								ENSG00000213300	HNRNPA3P6	0.470978	-0.494894	4.88314	0.0271203	0.171731
								ENSG00000182841	RRP7BP	0.471658	3.69425	7.14718	0.00750818	0.106378
								ENSG00000269867	AC010326.3	0.471751	1.42642	9.96341	0.00159682	0.066088
								ENSG00000101608	MYL12A	0.4745	2.80327	6.86499	0.00879009	0.112187
								ENSG00000136205	TNS3	0.475027	7.23464	4.94633	0.0261461	0.17059
								ENSG00000168461	RAB31	0.475172	7.04456	6.34949	0.0117415	0.122659
								ENSG00000183255	PTTG1IP	0.475429	6.46461	9.64043	0.00190341	0.0665966
								ENSG00000219507	FTH1P8	0.475705	-1.07565	3.92889	0.0474632	0.217921
								ENSG00000108785	HSD17B1P1	0.476777	3.24081	8.2016	0.00418535	0.0822368
								ENSG00000168610	STAT3	0.47737	6.81774	9.12548	0.00252073	0.0714575
								ENSG00000183401	CCDC159	0.47762	4.45338	6.90434	0.00859868	0.112187
								ENSG00000198721	ECI2	0.477632	2.95522	7.38706	0.00656949	0.101752
								ENSG00000215067	ALOX12-AS1	0.477666	2.25806	6.46671	0.0109914	0.1204
								ENSG00000188878	FBF1	0.478532	3.52919	10.2961	0.0013331	0.0659256
								ENSG00000143384	MCL1	0.47875	6.2533	9.34724	0.00223322	0.0688488
								ENSG00000232187	FTH1P7	0.479608	-0.409554	6.58951	0.0102581	0.117043
								ENSG00000170759	KIF5B	0.479851	8.53039	8.22766	0.00412567	0.0822066
								ENSG00000171163	ZNF692	0.481585	5.78137	6.25457	0.0123874	0.124155
								ENSG00000183779	ZNF703	0.481693	5.24634	4.56773	0.0325796	0.185909
								ENSG00000100209	HSCB	0.481878	1.82636	9.00944	0.00268589	0.0727679
								ENSG00000149591	TAGLN	0.48192	4.9533	7.58196	0.00589553	0.0969561
								ENSG00000131873	CHSY1	0.482707	4.26436	6.81253	0.00905202	0.113022
								ENSG00000113916	BCL6	0.482801	6.21883	8.43186	0.00368703	0.0803625
								ENSG00000204642	HLA-F	0.483119	2.99885	7.54923	0.00600357	0.097817
								ENSG00000249353	NPM1P27	0.483994	-0.41838	7.85218	0.00507595	0.0913646
								ENSG00000214402	LCNL1	0.484525	5.25956	4.11196	0.0425809	0.208094
								ENSG00000268189	AC005785.1	0.485089	1.05873	4.66018	0.03087	0.181947
								ENSG00000155368	DBI	0.485424	4.3911	9.51888	0.00203368	0.0676507
								ENSG00000249592	AC139887.2	0.485652	2.38158	6.65159	0.00990673	0.115701
								ENSG00000115541	HSPE1	0.485727	2.51403	8.23189	0.00411606	0.0822066
								ENSG00000122390	NAA60	0.485926	1.93449	8.07031	0.00449965	0.0856348
								ENSG00000138074	SLC5A6	0.485955	6.12919	6.56671	0.0103904	0.117614
								ENSG00000111275	ALDH2	0.486802	7.43436	9.58285	0.00196403	0.0668584
								ENSG00000169756	LIMS1	0.486902	4.09122	5.70169	0.0169486	0.143532
								ENSG00000148737	TCF7L2	0.487182	4.17982	7.4825	0.00623017	0.09966
								ENSG00000203739	AL645568.1	0.488544	1.42758	6.56356	0.0104088	0.117645
								ENSG00000074660	SCARF1	0.488951	3.79944	5.39482	0.0201966	0.152876
								ENSG00000105088	OLFM2	0.489112	7.68506	5.73795	0.0166021	0.141967
								ENSG00000181524	RPL24P4	0.489435	-1.25304	4.90255	0.026817	0.171653
								ENSG00000160999	SH2B2	0.489666	3.33966	5.15518	0.0231771	0.162172
								ENSG00000115129	TP53I3	0.489964	1.66533	10.2324	0.00137991	0.0659256
								ENSG00000143570	SLC39A1	0.490623	4.94883	10.2491	0.0013675	0.0659256
								ENSG00000120318	ARAP3	0.491555	4.79509	7.05839	0.0078895	0.109174
								ENSG00000232931	LINC00342	0.49257	3.81748	5.55699	0.018407	0.147704
								ENSG00000149564	ESAM	0.493175	5.30888	9.99061	0.00157341	0.066088
								ENSG00000071054	MAP4K4	0.493673	9.0339	4.15005	0.0416333	0.206831
								ENSG00000119688	ABCD4	0.493674	5.1971	7.34573	0.00672223	0.102138
								ENSG00000179144	GIMAP7	0.496434	1.73386	6.44571	0.0111221	0.12054
								ENSG00000106333	PCOLCE	0.496994	2.25942	5.7784	0.0162243	0.141913
								ENSG00000178464	RPL10P16	0.497455	-1.12008	5.41162	0.0200031	0.15183
								ENSG00000106991	ENG	0.497726	5.93427	5.10459	0.0238626	0.164749
								ENSG00000124067	SLC12A4	0.498079	5.67522	7.14484	0.00751798	0.106378
								ENSG00000235703	LINC00894	0.499109	3.15157	7.29146	0.0069283	0.103653
								ENSG00000140464	PML	0.499339	5.94567	8.13694	0.00433725	0.0833474
								ENSG00000162148	PPP1R32	0.499569	2.48228	7.87317	0.00501737	0.0909481
								ENSG00000061273	HDAC7	0.499944	5.99298	9.09526	0.00256272	0.0716747
								ENSG00000169249	ZRSR2	0.500077	3.31182	12.8412	0.000339068	0.0403578
								ENSG00000163110	PDLIM5	0.501773	5.94314	7.3795	0.00659716	0.102
								ENSG00000142046	TMEM91	0.502909	2.53708	7.91017	0.00491577	0.0899382
								ENSG00000213928	IRF9	0.504003	2.2187	5.26493	0.0217592	0.157665
								ENSG00000071967	CYBRD1	0.50436	5.14181	4.25848	0.0390549	0.200105
								ENSG00000166925	TSC22D4	0.504438	7.10871	3.97179	0.0462686	0.215348
								ENSG00000173039	RELA	0.504443	5.63732	9.01551	0.00267699	0.0727679
								ENSG00000100599	RIN3	0.504812	3.85644	7.66178	0.00564029	0.0956647
								ENSG00000230383	AC009245.1	0.5049	-1.76953	3.96784	0.0463773	0.215348
								ENSG00000186352	ANKRD37	0.504918	1.72061	6.6591	0.00986505	0.115529
								ENSG00000138029	HADHB	0.505537	6.09301	8.32203	0.00391671	0.080933
								ENSG00000147439	BIN3	0.506488	3.56375	6.80389	0.00909597	0.113306
								ENSG00000214063	TSPAN4	0.507126	4.00656	6.47125	0.0109633	0.1204
								ENSG00000186918	ZNF395	0.507283	4.67839	15.7317	7.29919e-05	0.0271584
								ENSG00000213398	LCAT	0.507346	4.32166	10.2665	0.00135467	0.0659256
								ENSG00000167470	MIDN	0.507445	6.29987	4.90483	0.0267817	0.171551
								ENSG00000241370	RPP21	0.508113	-0.612384	4.55093	0.0329008	0.18651
								ENSG00000117394	SLC2A1	0.511267	7.56195	5.98191	0.0144533	0.132811
								ENSG00000196689	TRPV1	0.511291	0.49498	5.32378	0.0210363	0.155584
								ENSG00000167397	VKORC1	0.511596	1.16233	8.93234	0.00280165	0.073665
								ENSG00000160685	ZBTB7B	0.512759	5.21657	6.87334	0.0087491	0.112187
								ENSG00000136770	DNAJC1	0.51288	3.80756	11.2555	0.00079389	0.0599148
								ENSG00000166432	ZMAT1	0.51551	5.26906	8.27046	0.00402953	0.0819151
								ENSG00000067900	ROCK1	0.516172	6.06023	11.4955	0.000697648	0.0565747
								ENSG00000180573	HIST1H2AC	0.516985	3.42619	6.48338	0.0108887	0.1204
								ENSG00000213442	RPL18AP3	0.517177	-0.283784	6.77621	0.00923809	0.113574
								ENSG00000165801	ARHGEF40	0.517945	5.80458	6.48848	0.0108575	0.120241
								ENSG00000211459	MT-RNR1	0.518485	12.5496	6.02259	0.0141239	0.13193
								ENSG00000198763	MT-ND2	0.518653	13.5199	7.31898	0.00682302	0.102427
								ENSG00000179348	GATA2	0.518826	3.35684	5.17553	0.0229072	0.161383
								ENSG00000213445	SIPA1	0.52008	4.94437	5.07611	0.0242578	0.165526
								ENSG00000136938	ANP32B	0.521448	5.43978	7.52125	0.00609755	0.0986164
								ENSG00000261884	AC040162.1	0.521687	2.28145	7.1459	0.00751357	0.106378
								ENSG00000213347	MXD3	0.523458	2.58894	4.55831	0.0327594	0.18619
								ENSG00000178764	ZHX2	0.523677	4.99096	5.28981	0.0214505	0.156213
								ENSG00000187266	EPOR	0.523708	3.34238	9.23496	0.00237438	0.0701361
								ENSG00000088826	SMOX	0.523952	5.97888	6.30464	0.0120422	0.123184
								ENSG00000160271	RALGDS	0.524286	8.1593	7.93101	0.00485948	0.0894407
								ENSG00000136830	FAM129B	0.524496	6.57273	8.83576	0.00295384	0.0751805
								ENSG00000132522	GPS2	0.524755	0.786072	7.70806	0.00549749	0.0948506
								ENSG00000111321	LTBR	0.525488	3.64735	6.54696	0.0105063	0.117988
								ENSG00000165458	INPPL1	0.526512	6.74721	8.95708	0.00276397	0.0732685
								ENSG00000087077	TRIP6	0.527183	4.11305	6.95509	0.00835812	0.111389
								ENSG00000126215	XRCC3	0.527624	4.7152	5.96588	0.0145853	0.133286
								ENSG00000233762	AC007969.1	0.528024	-0.159621	8.95348	0.00276941	0.0732685
								ENSG00000177674	AGTRAP	0.528573	3.1854	4.55737	0.0327773	0.18619
								ENSG00000113369	ARRDC3	0.529289	4.62428	4.67888	0.0305356	0.181461
								ENSG00000166341	DCHS1	0.531202	6.41461	5.78738	0.0161416	0.141332
								ENSG00000187800	PEAR1	0.531224	4.21844	9.03466	0.00264908	0.0727007
								ENSG00000155363	MOV10	0.532564	4.3551	8.83538	0.00295446	0.0751805
								ENSG00000110799	VWF	0.532737	7.68112	5.0558	0.0245436	0.166406
								ENSG00000135899	SP110	0.533173	3.23148	7.66479	0.00563089	0.0956647
								ENSG00000103260	METRN	0.533691	6.54719	7.72571	0.00544399	0.0943705
								ENSG00000162889	MAPKAPK2	0.534184	5.54541	10.3822	0.00127238	0.0659256
								ENSG00000064393	HIPK2	0.53427	10.5789	4.35213	0.0369628	0.195424
								ENSG00000135821	GLUL	0.534298	10.5932	3.84938	0.0497644	0.221506
								ENSG00000092820	EZR	0.535952	6.69774	4.59457	0.0320733	0.184596
								ENSG00000226976	COX6A1P2	0.536461	-1.06336	5.59461	0.0180159	0.147178
								ENSG00000140545	MFGE8	0.536517	6.19686	6.81311	0.00904911	0.113022
								ENSG00000114857	NKTR	0.536906	7.42943	8.35178	0.00385309	0.0807332
								ENSG00000196923	PDLIM7	0.53776	4.83712	8.2385	0.00410109	0.0822066
								ENSG00000082781	ITGB5	0.539231	5.55399	9.25282	0.00235133	0.0701361
								ENSG00000102030	NAA10	0.539426	4.89669	9.57561	0.0019718	0.0668584
								ENSG00000117318	ID3	0.540807	3.3754	6.06146	0.0138164	0.130049
								ENSG00000146425	DYNLT1	0.541995	3.02543	12.7927	0.000347975	0.0403578
								ENSG00000108848	LUC7L3	0.542363	7.62799	11.8653	0.00057189	0.0512483
								ENSG00000137767	SQOR	0.542513	0.404991	8.23052	0.00411916	0.0822066
								ENSG00000172216	CEBPB	0.54325	3.99156	6.38061	0.0115374	0.122368
								ENSG00000237977	EIF4HP2	0.543577	1.84431	6.85227	0.00885286	0.112187
								ENSG00000163794	UCN	0.544544	2.79299	10.2874	0.00133943	0.0659256
								ENSG00000102890	ELMO3	0.544831	3.56333	7.2803	0.0069715	0.103664
								ENSG00000217930	PAM16	0.545375	1.65126	4.44471	0.0350095	0.191065
								ENSG00000148288	GBGT1	0.546186	2.38979	7.39621	0.00653616	0.101414
								ENSG00000158195	WASF2	0.548753	6.86061	8.5646	0.00342763	0.0774527
								ENSG00000167543	TP53I13	0.549683	4.29723	7.03288	0.00800265	0.110156
								ENSG00000107317	PTGDS	0.549726	9.89238	5.77014	0.0163007	0.141922
								ENSG00000119408	NEK6	0.549957	5.30304	11.0157	0.000903452	0.0657848
								ENSG00000173209	AHSA2	0.550979	5.18063	6.46608	0.0109953	0.1204
								ENSG00000092531	SNAP23	0.552556	2.76585	7.26696	0.00702345	0.103664
								ENSG00000266490	AC127024.5	0.554631	1.35994	6.67837	0.00975897	0.115294
								ENSG00000105854	PON2	0.555068	5.71722	6.1348	0.0132546	0.127039
								ENSG00000146535	GNA12	0.555264	7.3301	10.5855	0.00113979	0.0659256
								ENSG00000244627	Z98749.2	0.555453	2.53305	6.81091	0.00906027	0.113022
								ENSG00000130202	NECTIN2	0.555743	4.95837	7.92567	0.00487383	0.0894407
								ENSG00000236552	RPL13AP5	0.555852	-0.354746	5.68657	0.0170952	0.144079
								ENSG00000269958	AL049840.4	0.556752	2.99569	9.0242	0.00266428	0.0727679
								ENSG00000173457	PPP1R14B	0.556787	3.1302	8.78133	0.0030433	0.0751805
								ENSG00000123933	MXD4	0.556793	7.56514	13.2513	0.000272395	0.0395012
								ENSG00000089327	FXYD5	0.557411	2.14607	8.33725	0.00388404	0.0807332
								ENSG00000179406	LINC00174	0.558543	3.74539	6.46195	0.0110209	0.12053
								ENSG00000147421	HMBOX1	0.559524	5.83635	10.877	0.00097366	0.0658354
								ENSG00000153048	CARHSP1	0.560537	4.31061	10.9282	0.000947121	0.0657848
								ENSG00000069702	TGFBR3	0.560854	4.01175	9.80603	0.00173941	0.0664391
								ENSG00000234975	FTH1P2	0.561166	-0.552277	7.77013	0.00531174	0.0934818
								ENSG00000167107	ACSF2	0.561511	3.4767	7.67893	0.00558691	0.0956647
								ENSG00000132530	XAF1	0.561705	5.12455	7.02344	0.00804497	0.110339
								ENSG00000212694	LINC01089	0.562098	4.50221	6.99556	0.00817121	0.110913
								ENSG00000143819	EPHX1	0.562258	6.3855	6.85302	0.00884917	0.112187
								ENSG00000197728	RPS26	0.563103	3.97478	9.03914	0.00264259	0.0727007
								ENSG00000112079	STK38	0.563999	3.76936	12.6266	0.000380293	0.0405618
								ENSG00000240065	PSMB9	0.565473	2.16499	10.0234	0.00154562	0.0659256
								ENSG00000064961	HMG20B	0.566981	4.18061	8.33607	0.00388657	0.0807332
								ENSG00000183773	AIFM3	0.571264	6.22565	10.2938	0.00133477	0.0659256
								ENSG00000147065	MSN	0.572052	6.75699	9.67909	0.00186377	0.0664391
								ENSG00000132424	PNISR	0.572213	7.59129	13.1162	0.000292756	0.0395012
								ENSG00000196411	EPHB4	0.573094	3.55241	7.05735	0.00789405	0.109174
								ENSG00000213866	YBX1P10	0.574923	-1.66691	5.76165	0.0163797	0.141922
								ENSG00000137496	IL18BP	0.5752	3.15552	7.4725	0.00626486	0.0999205
								ENSG00000141736	ERBB2	0.576239	4.96205	5.91984	0.0149713	0.134849
								ENSG00000229152	ANKRD10-IT1	0.577241	1.69875	7.79762	0.0052315	0.0926271
								ENSG00000212907	MT-ND4L	0.577849	11.0824	7.48854	0.00620927	0.099507
								ENSG00000260884	AC009120.4	0.579856	1.42465	6.0179	0.0141615	0.13193
								ENSG00000105287	PRKD2	0.580084	4.1862	11.5517	0.000676889	0.0565747
								ENSG00000164039	BDH2	0.580132	2.56105	7.7134	0.00548124	0.0947565
								ENSG00000198467	TPM2	0.581054	4.97217	6.25896	0.0123567	0.124155
								ENSG00000101400	SNTA1	0.581424	7.56882	10.4382	0.00123439	0.0659256
								ENSG00000172340	SUCLG2	0.584481	3.35802	10.3453	0.00129804	0.0659256
								ENSG00000205583	STAG3L1	0.58485	0.979583	8.86971	0.00289941	0.0751805
								ENSG00000163191	S100A11	0.586705	1.67412	6.94685	0.00839667	0.111389
								ENSG00000103335	PIEZO1	0.587145	6.05936	4.95883	0.0259578	0.17012
								ENSG00000073605	GSDMB	0.588157	3.7365	7.77405	0.00530022	0.0934669
								ENSG00000259291	ZNF710-AS1	0.588877	3.70042	11.4382	0.000719498	0.0566547
								ENSG00000122971	ACADS	0.590751	3.97345	7.82088	0.00516461	0.0921861
								ENSG00000114738	MAPKAPK3	0.591288	4.14789	7.56176	0.00596198	0.0975012
								ENSG00000179967	PPP1R14BP3	0.591319	0.959507	6.92705	0.00849017	0.112121
								ENSG00000126458	RRAS	0.591951	3.40695	12.7275	0.000360317	0.0404333
								ENSG00000096433	ITPR3	0.592786	4.93666	8.40993	0.00373177	0.0803625
								ENSG00000160691	SHC1	0.593623	5.47451	13.1635	0.000285456	0.0395012
								ENSG00000198899	MT-ATP6	0.593854	12.8974	8.35465	0.00384701	0.0807332
								ENSG00000078246	TULP3	0.59469	4.00756	8.56292	0.00343078	0.0774527
								ENSG00000143772	ITPKB	0.594964	7.75542	4.39535	0.036037	0.193237
								ENSG00000270049	AC009061.2	0.595532	2.27771	10.5062	0.00118975	0.0659256
								ENSG00000255200	PGAM1P8	0.596044	0.0121637	9.41598	0.00215103	0.068477
								ENSG00000147576	ADHFE1	0.596132	3.91902	7.76291	0.005333	0.0934818
								ENSG00000149782	PLCB3	0.596818	4.2527	9.91222	0.00164185	0.0661426
								ENSG00000105552	BCAT2	0.597314	4.90863	8.72793	0.00313373	0.0751805
								ENSG00000149499	EML3	0.597953	5.3463	7.36942	0.00663424	0.102099
								ENSG00000119403	PHF19	0.598617	4.95751	7.44324	0.00636753	0.100369
								ENSG00000144749	LRIG1	0.598744	6.58765	4.85157	0.0276209	0.1724
								ENSG00000205336	ADGRG1	0.599689	7.99449	6.1693	0.0129986	0.126276
								ENSG00000148175	STOM	0.601094	6.12022	7.50461	0.00615413	0.099187
								ENSG00000182196	ARL6IP4	0.601359	-0.567883	5.21401	0.0224056	0.159713
								ENSG00000142173	COL6A2	0.602452	5.4003	7.98955	0.0047048	0.0880528
								ENSG00000198520	C1orf228	0.602491	2.80245	8.41951	0.00371216	0.0803625
								ENSG00000122884	P4HA1	0.60369	3.83357	10.4231	0.00124449	0.0659256
								ENSG00000099840	IZUMO4	0.604474	3.83992	8.20453	0.0041786	0.0822368
								ENSG00000189171	S100A13	0.604761	1.89822	7.87123	0.00502275	0.0909481
								ENSG00000204580	DDR1	0.604962	8.52451	5.31342	0.0211618	0.155584
								ENSG00000228305	AC016734.1	0.605775	-1.83915	5.48974	0.0191284	0.15009
								ENSG00000163453	IGFBP7	0.605999	5.52155	12.5892	0.000387974	0.0405618
								ENSG00000168394	TAP1	0.606667	4.10054	7.8489	0.00508515	0.0913646
								ENSG00000152518	ZFP36L2	0.606927	5.04806	5.06381	0.0244305	0.166124
								ENSG00000095397	WHRN	0.606962	6.04059	3.8778	0.0489287	0.220291
								ENSG00000238103	RPL9P7	0.607374	-1.20169	5.36172	0.0205835	0.154432
								ENSG00000119943	PYROXD2	0.607456	3.23847	10.055	0.00151934	0.0659256
								ENSG00000215788	TNFRSF25	0.608255	5.48857	5.28645	0.021492	0.156244
								ENSG00000230551	AC021078.1	0.608366	4.19335	9.45538	0.00210531	0.068477
								ENSG00000254505	CHMP4A	0.608911	1.09192	6.99244	0.00818546	0.110913
								ENSG00000165030	NFIL3	0.61006	3.59602	7.44041	0.00637753	0.100369
								ENSG00000177943	MAMDC4	0.611929	4.96269	4.49049	0.0340839	0.189446
								ENSG00000187091	PLCD1	0.612295	4.64392	8.64743	0.00327523	0.0768568
								ENSG00000185650	ZFP36L1	0.612479	6.56519	7.36201	0.00666164	0.102099
								ENSG00000131634	TMEM204	0.612519	3.48713	8.27555	0.00401825	0.0818753
								ENSG00000266145	AP001004.1	0.614034	2.12475	6.59379	0.0102335	0.117043
								ENSG00000100106	TRIOBP	0.615701	2.86099	12.4547	0.000416945	0.0425769
								ENSG00000218426	AL590867.2	0.615859	-1.80395	4.07932	0.0434112	0.209356
								ENSG00000174021	GNG5	0.617918	2.35606	9.68051	0.00186233	0.0664391
								ENSG00000225032	AL162586.1	0.6199	2.79748	6.39463	0.0114466	0.122045
								ENSG00000224383	PRR29	0.620223	3.02663	6.35841	0.0116826	0.122659
								ENSG00000163346	PBXIP1	0.620829	7.21771	6.62858	0.0100355	0.116736
								ENSG00000120896	SORBS3	0.621701	6.20394	8.79441	0.00302155	0.0751805
								ENSG00000184113	CLDN5	0.623509	6.33721	8.17417	0.00424911	0.0826158
								ENSG00000113504	SLC12A7	0.624667	6.19961	7.1296	0.00758218	0.106582
								ENSG00000141510	TP53	0.62616	3.01355	9.89362	0.00165853	0.0661426
								ENSG00000142961	MOB3C	0.627075	3.70414	10.6935	0.00107514	0.0659256
								ENSG00000075234	TTC38	0.628339	3.00974	6.45187	0.0110836	0.12054
								ENSG00000226360	AC096919.1	0.629997	-2.40529	3.96911	0.0463422	0.215348
								ENSG00000100439	ABHD4	0.630632	5.06398	13.6513	0.000220083	0.0394443
								ENSG00000198938	MT-CO3	0.630737	13.0219	9.2322	0.00237796	0.0701361
								ENSG00000215630	GUSBP9	0.631241	0.49003	6.88181	0.00870772	0.112187
								ENSG00000185946	RNPC3	0.631706	5.65791	7.72433	0.00544817	0.0943705
								ENSG00000129250	KIF1C	0.631963	8.73325	4.73965	0.0294752	0.178063
								ENSG00000005243	COPZ2	0.632646	1.75042	13.2324	0.000275152	0.0395012
								ENSG00000070404	FSTL3	0.633917	4.36572	10.709	0.00106618	0.0659256
								ENSG00000168899	VAMP5	0.63441	2.52142	14.1521	0.000168609	0.0354039
								ENSG00000198727	MT-CYB	0.63601	13.8467	7.56717	0.00594409	0.0975012
								ENSG00000100429	HDAC10	0.637999	2.41198	8.65804	0.00325621	0.0766649
								ENSG00000106404	CLDN15	0.638751	3.74254	6.38458	0.0115116	0.122324
								ENSG00000198888	MT-ND1	0.639566	13.8856	9.76385	0.00177977	0.0664391
								ENSG00000248527	MTATP6P1	0.640402	10.6638	13.113	0.000293261	0.0395012
								ENSG00000172638	EFEMP2	0.640466	5.24706	10.3461	0.0012975	0.0659256
								ENSG00000251562	MALAT1	0.640631	12.2315	8.5021	0.00354736	0.0792696
								ENSG00000188599	NPIPP1	0.642926	2.12166	9.43891	0.0021243	0.068477
								ENSG00000106003	LFNG	0.644948	3.9543	5.3635	0.0205625	0.154432
								ENSG00000163659	TIPARP	0.646007	4.45534	5.00529	0.02527	0.169228
								ENSG00000270804	AC010326.4	0.646236	1.28627	12.6864	0.000368329	0.0404333
								ENSG00000120889	TNFRSF10B	0.646293	3.3116	8.47022	0.00361007	0.0800597
								ENSG00000110492	MDK	0.648567	2.67225	9.14017	0.00250058	0.0712991
								ENSG00000144040	SFXN5	0.649895	7.96883	10.6933	0.00107523	0.0659256
								ENSG00000234664	HMGN2P5	0.64999	-1.06007	6.79103	0.00916171	0.113481
								ENSG00000133321	RARRES3	0.651928	2.0336	6.74333	0.00940989	0.113983
								ENSG00000160781	PAQR6	0.652479	8.9656	5.58024	0.0181642	0.147178
								ENSG00000167315	ACAA2	0.652696	4.07247	14.3479	0.000151946	0.0354039
								ENSG00000261207	AL031717.1	0.654698	2.11706	7.10394	0.00769147	0.107108
								ENSG00000186994	KANK3	0.655352	4.60806	6.67161	0.00979604	0.11532
								ENSG00000000938	FGR	0.65553	3.11407	6.87025	0.00876424	0.112187
								ENSG00000113721	PDGFRB	0.660418	6.78926	14.4864	0.000141179	0.0354039
								ENSG00000008128	CDK11A	0.660734	0.757485	8.40629	0.00373925	0.0803625
								ENSG00000154134	ROBO3	0.663091	5.15165	9.1026	0.00255247	0.0716747
								ENSG00000213658	LAT	0.663988	-0.56271	6.34691	0.0117586	0.122659
								ENSG00000090924	PLEKHG2	0.66403	3.47449	10.218	0.00139075	0.0659256
								ENSG00000101439	CST3	0.664904	9.16298	7.04244	0.00796003	0.109914
								ENSG00000169715	MT1E	0.664942	3.00297	5.60593	0.0178998	0.147046
								ENSG00000002933	TMEM176A	0.665898	3.07948	5.89455	0.0151878	0.13624
								ENSG00000185187	SIGIRR	0.667708	3.29102	14.3312	0.000153303	0.0354039
								ENSG00000220201	ZGLP1	0.668115	1.25953	5.5745	0.0182239	0.147178
								ENSG00000226221	AC022431.1	0.669052	-2.18896	4.24714	0.0393165	0.200552
								ENSG00000198712	MT-CO2	0.674556	13.2316	10.503	0.00119179	0.0659256
								ENSG00000182541	LIMK2	0.676153	5.26497	11.4304	0.000722538	0.0566547
								ENSG00000169871	TRIM56	0.677706	4.91747	8.40228	0.0037475	0.0803625
								ENSG00000165795	NDRG2	0.679926	10.1874	10.8753	0.000974561	0.0658354
								ENSG00000099875	MKNK2	0.68154	6.38967	10.4344	0.00123688	0.0659256
								ENSG00000130164	LDLR	0.688961	5.56589	8.4497	0.00365103	0.0803625
								ENSG00000158769	F11R	0.690957	2.75417	17.6656	2.6334e-05	0.0231265
								ENSG00000102007	PLP2	0.692532	1.45499	9.86221	0.00168708	0.0661426
								ENSG00000155366	RHOC	0.695256	4.48942	14.9191	0.000112223	0.0339841
								ENSG00000228109	MELTF-AS1	0.696532	2.63164	7.459	0.00631201	0.100369
								ENSG00000154930	ACSS1	0.699244	6.72277	7.5301	0.00606764	0.0983137
								ENSG00000146112	PPP1R18	0.699423	4.2235	13.288	0.000267112	0.0395012
								ENSG00000158710	TAGLN2	0.701226	5.30188	15.9587	6.47407e-05	0.0271584
								ENSG00000121310	ECHDC2	0.702767	5.53209	13.3786	0.000254505	0.0395012
								ENSG00000244313	AC024293.1	0.703088	-0.321318	15.7773	7.12529e-05	0.0271584
								ENSG00000087266	SH3BP2	0.703472	5.08513	8.33815	0.00388211	0.0807332
								ENSG00000141526	SLC16A3	0.70718	3.40666	5.48231	0.0192099	0.15009
								ENSG00000204388	HSPA1B	0.707283	5.46366	5.37686	0.0204056	0.153689
								ENSG00000168884	TNIP2	0.708951	3.63238	13.7084	0.000213502	0.0394443
								ENSG00000186010	NDUFA13	0.709199	1.06362	7.17429	0.00739557	0.106378
								ENSG00000132002	DNAJB1	0.709586	7.04055	9.86828	0.00168153	0.0661426
								ENSG00000149489	ROM1	0.710386	3.79879	8.79938	0.00301333	0.0751805
								ENSG00000210082	MT-RNR2	0.711788	15.2278	10.2862	0.00134029	0.0659256
								ENSG00000210174	MT-TR	0.714057	-2.15996	4.40079	0.0359223	0.193181
								ENSG00000142227	EMP3	0.715865	2.12266	12.9566	0.000318795	0.0403578
								ENSG00000185291	IL3RA	0.716522	4.00885	10.4127	0.00125149	0.0659256
								ENSG00000239763	AC009120.1	0.719052	1.52471	5.85794	0.0155069	0.137734
								ENSG00000198604	BAZ1A	0.723872	3.82578	12.9067	0.000327417	0.0403578
								ENSG00000244398	AC116533.1	0.724804	-1.63766	8.77341	0.00305654	0.0751805
								ENSG00000130702	LAMA5	0.725541	7.41202	6.60073	0.0101937	0.117043
								ENSG00000130052	STARD8	0.727971	4.35876	10.0799	0.00149893	0.0659256
								ENSG00000143514	TP53BP2	0.728588	6.19982	8.0304	0.00459988	0.0865013
								ENSG00000244119	PDCL3P4	0.728715	0.6968	10.3673	0.00128266	0.0659256
								ENSG00000210049	MT-TF	0.730993	0.194584	4.80962	0.0283013	0.17489
								ENSG00000261373	VPS9D1-AS1	0.732104	2.58972	12.9689	0.000316702	0.0403578
								ENSG00000198805	PNP	0.73271	2.32038	11.1134	0.000857082	0.0632512
								ENSG00000108622	ICAM2	0.735535	1.56046	10.7047	0.00106864	0.0659256
								ENSG00000178458	H3F3AP6	0.739625	-2.51789	4.63361	0.0313516	0.183055
								ENSG00000241839	PLEKHO2	0.740033	5.01767	9.6914	0.00185133	0.0664391
								ENSG00000147872	PLIN2	0.740397	3.1086	9.20263	0.00241668	0.0701361
								ENSG00000198804	MT-CO1	0.740922	15.6939	9.29378	0.00229933	0.0696459
								ENSG00000249565	SERBP1P5	0.742303	-2.06366	3.85566	0.0495783	0.221232
								ENSG00000122862	SRGN	0.742531	3.26622	8.335	0.00388884	0.0807332
								ENSG00000013364	MVP	0.743423	5.62318	10.0774	0.00150098	0.0659256
								ENSG00000210112	MT-TM	0.743484	-0.811238	4.40285	0.035879	0.193154
								ENSG00000146215	CRIP3	0.746617	1.87511	9.89555	0.00165679	0.0661426
								ENSG00000106565	TMEM176B	0.747259	3.29035	8.83355	0.00295742	0.0751805
								ENSG00000068976	PYGM	0.748269	5.19682	7.58551	0.00588394	0.0969561
								ENSG00000161955	TNFSF13	0.749844	1.62482	10.7734	0.00102972	0.0659256
								ENSG00000141753	IGFBP4	0.753094	5.40871	9.41507	0.00215209	0.068477
								ENSG00000168209	DDIT4	0.753619	3.27886	4.74069	0.0294572	0.178063
								ENSG00000161638	ITGA5	0.754452	3.62532	9.68904	0.0018537	0.0664391
								ENSG00000173991	TCAP	0.756176	3.42102	9.04694	0.00263135	0.0727007
								ENSG00000214389	RPS3AP26	0.756756	-2.02599	6.85608	0.00883403	0.112187
								ENSG00000142733	MAP3K6	0.759073	4.94092	9.32928	0.00225521	0.0692491
								ENSG00000129219	PLD2	0.762951	5.08034	10.4619	0.00121859	0.0659256
								ENSG00000168255	POLR2J3	0.764394	1.90808	7.60172	0.00583128	0.0969561
								ENSG00000196839	ADA	0.76666	2.60651	8.29176	0.00398253	0.0818753
								ENSG00000240376	AC010343.1	0.773384	-2.0394	7.98661	0.00471246	0.0880528
								ENSG00000138080	EMILIN1	0.777736	4.56511	10.3276	0.00131058	0.0659256
								ENSG00000182718	ANXA2	0.782972	3.60023	13.0706	0.00029996	0.0395012
								ENSG00000237039	AC018738.1	0.78809	-1.63761	4.57153	0.0325076	0.185697
								ENSG00000104518	GSDMD	0.793589	3.63317	12.6365	0.000378279	0.0405618
								ENSG00000187534	PRR13P5	0.80112	0.0574618	12.687	0.000368215	0.0404333
								ENSG00000210196	MT-TP	0.804032	4.7095	8.58988	0.00338036	0.0774527
								ENSG00000230202	AL450405.1	0.805758	0.881873	7.90144	0.00493954	0.0899979
								ENSG00000237758	BANF1P3	0.807017	-2.16037	5.42513	0.019849	0.151793
								ENSG00000185033	SEMA4B	0.809014	6.02616	10.2271	0.00138393	0.0659256
								ENSG00000185507	IRF7	0.810317	3.51255	8.71595	0.00315438	0.0752765
								ENSG00000227232	WASH7P	0.815348	2.80189	16.8248	4.09933e-05	0.0255034
								ENSG00000109062	SLC9A3R1	0.816473	6.2118	7.26814	0.00701884	0.103664
								ENSG00000198886	MT-ND4	0.816582	15.4124	13.6682	0.000218112	0.0394443
								ENSG00000238083	LRRC37A2	0.817669	2.59532	6.74469	0.00940272	0.113983
								ENSG00000170989	S1PR1	0.819364	5.83737	8.2824	0.00400312	0.0818753
								ENSG00000197324	LRP10	0.826736	6.77428	11.7291	0.000615292	0.0529755
								ENSG00000159423	ALDH4A1	0.82679	5.94239	10.127	0.00146109	0.0659256
								ENSG00000243716	NPIPB5	0.828049	2.3372	9.01654	0.00267547	0.0727679
								ENSG00000002586	CD99	0.830958	4.8391	9.27642	0.00232122	0.0696459
								ENSG00000107738	VSIR	0.835833	5.67464	6.94776	0.00839242	0.111389
								ENSG00000092929	UNC13D	0.836278	4.07911	7.9441	0.00482445	0.0894407
								ENSG00000229833	PET100	0.838174	-0.290864	16.598	4.62002e-05	0.0255034
								ENSG00000116717	GADD45A	0.842922	3.99452	8.75911	0.00308059	0.0751805
								ENSG00000056972	TRAF3IP2	0.843274	3.751	15.086	0.000102724	0.0334121
								ENSG00000141401	IMPA2	0.843291	2.24913	19.1967	1.17918e-05	0.011941
								ENSG00000135926	TMBIM1	0.8452	6.39225	11.9496	0.000546583	0.0505272
								ENSG00000109113	RAB34	0.847454	3.98478	11.4749	0.000705441	0.0565747
								ENSG00000184232	OAF	0.863896	5.10969	11.4665	0.000708633	0.0565747
								ENSG00000100427	MLC1	0.869514	7.9193	8.92667	0.00281037	0.0736736
								ENSG00000089159	PXN	0.869749	5.51018	13.4367	0.000246746	0.0395012
								ENSG00000116962	NID1	0.872838	4.14725	13.7507	0.000208744	0.0394443
								ENSG00000067182	TNFRSF1A	0.874148	4.33933	12.7614	0.000353855	0.0403578
								ENSG00000228929	RPS13P2	0.875323	-2.45089	7.4128	0.00647614	0.100839
								ENSG00000008517	IL32	0.876785	1.32544	9.57924	0.0019679	0.0668584
								ENSG00000213719	CLIC1	0.891374	3.03445	14.4416	0.000144571	0.0354039
								ENSG00000237506	RPSAP15	0.898546	-2.66269	5.25256	0.0219145	0.157946
								ENSG00000125520	SLC2A4RG	0.900907	5.67039	9.74081	0.00180221	0.0664391
								ENSG00000198786	MT-ND5	0.903908	13.7078	15.6249	7.7229e-05	0.0271584
								ENSG00000210077	MT-TV	0.905	-2.16329	4.13485	0.0420087	0.20732
								ENSG00000227081	AC005912.1	0.906735	-2.75987	5.52014	0.0187987	0.149178
								ENSG00000150527	CTAGE5	0.915424	-0.623179	9.69713	0.00184556	0.0664391
								ENSG00000182511	FES	0.929168	3.68567	14.639	0.00013019	0.0354039
								ENSG00000064932	SBNO2	0.933891	5.49233	10.7761	0.0010282	0.0659256
								ENSG00000221869	CEBPD	0.936037	3.29454	7.14876	0.00750159	0.106378
								ENSG00000105227	PRX	0.944535	4.19095	8.94768	0.00277823	0.0732685
								ENSG00000235776	AC000089.1	0.944854	-2.51414	6.72302	0.00951762	0.11403
								ENSG00000196843	ARID5A	0.953906	4.97341	8.58777	0.00338428	0.0774527
								ENSG00000236801	RPL24P8	0.956169	-1.78285	15.5487	8.04051e-05	0.0271584
								ENSG00000104881	PPP1R13L	0.957124	3.25308	13.8395	0.000199108	0.038857
								ENSG00000240509	RPL34P18	0.959332	-2.71278	6.0102	0.0142234	0.13218
								ENSG00000229119	AC026403.1	0.962565	-3.15715	4.29186	0.0382953	0.198179
								ENSG00000198695	MT-ND6	0.970647	11.3213	11.7967	0.00059335	0.0524089
								ENSG00000188313	PLSCR1	0.971237	2.9519	13.9512	0.000187622	0.0374477
								ENSG00000125148	MT2A	0.982837	4.14205	10.4635	0.00121753	0.0659256
								ENSG00000220472	AL139095.2	0.984288	-2.86567	4.33389	0.0373608	0.196123
								ENSG00000234648	AL162151.2	0.985095	-2.28033	10.1988	0.00140531	0.0659256
								ENSG00000131981	LGALS3	0.986187	3.9076	15.691	7.45769e-05	0.0271584
								ENSG00000086544	ITPKC	0.989288	4.69792	9.19633	0.002425	0.0701361
								ENSG00000233270	SNRPEP4	0.993682	-1.85104	6.30682	0.0120274	0.123184
								ENSG00000176014	TUBB6	0.996348	3.59836	13.0619	0.000301364	0.0395012
								ENSG00000142102	PGGHG	1.00243	4.55825	11.4846	0.000701744	0.0565747
								ENSG00000197142	ACSL5	1.0093	3.62459	14.1815	0.000165998	0.0354039
								ENSG00000256633	AP005019.1	1.01729	-0.284425	9.95522	0.00160394	0.066088
								ENSG00000250461	AC122718.1	1.02393	1.51541	9.95582	0.00160342	0.066088
								ENSG00000106211	HSPB1	1.03981	5.82865	11.7675	0.000602744	0.0524089
								ENSG00000196205	EEF1A1P5	1.07708	2.60439	13.2858	0.00026742	0.0395012
								ENSG00000185885	IFITM1	1.10318	1.82995	12.2318	0.000469818	0.0458438
								ENSG00000204389	HSPA1A	1.1396	5.55877	11.913	0.000557434	0.0509936
								ENSG00000077150	NFKB2	1.143	3.84543	16.4688	4.94581e-05	0.0255034
								ENSG00000102265	TIMP1	1.15067	3.53487	16.9091	3.9214e-05	0.0255034
								ENSG00000210195	MT-TT	1.15696	0.443438	10.5616	0.00115463	0.0659256
								ENSG00000124762	CDKN1A	1.20199	4.82091	10.5957	0.00113353	0.0659256
								ENSG00000234287	AC099560.2	1.20267	-3.24485	4.8237	0.0280711	0.174167
								ENSG00000142089	IFITM3	1.20652	5.47439	16.2614	5.5177e-05	0.0255034
								ENSG00000125733	TRIP10	1.21752	3.29141	19.4359	1.04033e-05	0.011941
								ENSG00000128016	ZFP36	1.22331	4.75371	6.69497	0.00966854	0.114768
								ENSG00000127418	FGFRL1	1.22341	6.54156	14.3323	0.000153212	0.0354039
								ENSG00000187193	MT1X	1.23936	1.60908	6.41063	0.0113439	0.122045
								ENSG00000230979	AC079250.1	1.2615	-1.89813	20.3121	6.57833e-06	0.0115542
								ENSG00000077238	IL4R	1.27194	4.30464	14.1442	0.000169319	0.0354039
								ENSG00000069399	BCL3	1.29092	2.88953	16.5998	4.61565e-05	0.0255034
								ENSG00000235912	AL031729.1	1.31605	-3.59546	4.16736	0.0412101	0.20598
								ENSG00000232573	RPL3P4	1.34659	0.724976	7.1576	0.00746469	0.106378
								ENSG00000149257	SERPINH1	1.37213	4.19903	17.1709	3.41631e-05	0.0255034
								ENSG00000188536	HBA2	1.42737	2.89353	13.5304	0.000234728	0.0395012
								ENSG00000210107	MT-TQ	1.42811	-3.88586	3.9988	0.0455328	0.214177
								ENSG00000185201	IFITM2	1.49534	3.52612	19.7657	8.75398e-06	0.011941
								ENSG00000244734	HBB	1.51054	5.44	10.92	0.000951341	0.0657848
								ENSG00000237973	MTCO1P12	1.60732	9.22116	13.0863	0.000297464	0.0395012
								ENSG00000099860	GADD45B	1.68689	4.5662	14.6888	0.000126799	0.0354039
								ENSG00000151929	BAG3	1.76284	5.66187	19.1259	1.22375e-05	0.011941
								ENSG00000170468	RIOX1	1.81205	-3.70962	6.15189	0.0131272	0.126964
								ENSG00000060138	YBX3	1.83786	4.03376	21.2258	4.08242e-06	0.00896296

## Sheet: Sup. table S5
Results of preservation analysis in each brain region
Brain regions	Module	Index	Size	Overlapped DEGs	Fisher p-value	Fisher FDR	Zsummary
DLPFC	blue	D1	1011	92	8.15655e-05	0.000244697	13.251
	brown	D2	630	91	1.03836e-15	6.23019e-15	19.782
	green	D3	428	14	0.999272	1	6.15155
	red	D4	256	9	0.98814	1	4.31422
	turquoise	D5	1072	27	1	1	10.0394
	yellow	D6	586	24	0.99692	1	-0.571724
AnCg	black	A1	178	8	0.710718	0.999993	5.3572
	blue	A2	723	22	0.999091	0.999993	8.98575
	brown	A3	708	55	0.000669716	0.00200915	14.7706
	green	A4	476	29	0.192278	0.432625	-1.17634
	magenta	A5	53	3	0.521579	0.938842	3.10648
	pink	A6	69	15	1.421e-06	1.2789e-05	4.60662
	red	A7	223	26	5.78761e-05	0.000260443	0.943314
	turquoise	A8	855	32	0.98866	0.999993	1.18254
	yellow	A9	683	15	0.999993	0.999993	5.51515
nAcc	black	N1	147	12	0.342654	1	0.62853
	blue	N2	612	31	0.98924	1	9.72964
	brown	N3	584	10	1	1	9.829
	green	N4	215	6	0.998547	1	5.37734
	magenta	N5	104	7	0.610286	1	2.5649
	pink	N6	118	5	0.929	1	1.23324
	purple	N7	98	7	0.545595	1	0.704097
	red	N8	210	12	0.822127	1	6.40911
	turquoise	N9	979	127	1.71887e-16	1.71887e-15	25.3773
	yellow	N10	218	15	0.584153	1	0.451032
Abbreviations: DLPFC = dorsolateral prefrontal cortex; AnCg = anterior cingulate gyrus; nAcc = nucleus accumben; DEGs: differentially expressed genes; FDR: false discovery rate.

## Sheet: Sup. table S6
List of each preserved DEGs cluster
DLPFC-blue					DLPFC-brown					AnCg-brown					AnCg-pink					nAcc-turquoise
ID	Names	p_value	logFC		ID	Names	p_value	logFC		ID	Names	p_value	logFC		ID	Names	p_value	logFC		ID	Names	p_value	logFC
ENSG00000067840	PDZD4	0.000168177	-0.747747		ENSG00000142534	RPS11	0.00361172	-0.457073		ENSG00000131584	ACAP3	0.0157238	0.457767		ENSG00000110721	CHKA	0.0060717	0.516017		ENSG00000100316	RPL3	0.0110743	-0.453661
ENSG00000131584	ACAP3	0.0157238	0.457767		ENSG00000130522	JUND	0.0185392	-0.687358		ENSG00000135519	KCNH3	0.0021124	0.763518		ENSG00000196295	GARS-DT	0.0179023	0.440399		ENSG00000274012	RN7SL2	0.00829894	-0.910843
ENSG00000135519	KCNH3	0.0021124	0.763518		ENSG00000231500	RPS18	0.00582469	-0.511598		ENSG00000130522	JUND	0.0185392	-0.687358		ENSG00000205583	STAG3L1	0.02108	0.489602		ENSG00000142534	RPS11	0.00361172	-0.457073
ENSG00000107281	NPDC1	0.000890823	0.837467		ENSG00000131116	ZNF428	0.00111838	-0.441312		ENSG00000107281	NPDC1	0.000890823	0.837467		ENSG00000230715	AC018638.2	0.00419947	0.498148		ENSG00000110651	CD81	0.00063346	-0.46791
ENSG00000110651	CD81	0.00063346	-0.46791		ENSG00000089009	AC004086.1	0.0220667	-0.385171		ENSG00000131116	ZNF428	0.00111838	-0.441312		ENSG00000147454	SLC25A37	0.00595194	0.647282		ENSG00000231500	RPS18	0.00582469	-0.511598
ENSG00000167978	SRRM2	0.00468516	0.425394		ENSG00000198034	RPS4X	0.0478674	-0.4301		ENSG00000212864	RNF208	0.0415708	0.55573		ENSG00000243302	AC018638.4	0.0292926	0.382556		ENSG00000083845	RPS5	0.0113634	-0.414061
ENSG00000204389	HSPA1A	0.0275568	0.419427		ENSG00000212864	RNF208	0.0415708	0.55573		ENSG00000184545	DUSP8	0.0424052	-0.443706		ENSG00000265298	AC132812.1	0.00109058	0.577488		ENSG00000089009	AC004086.1	0.0220667	-0.385171
ENSG00000184545	DUSP8	0.0424052	-0.443706		ENSG00000142541	RPL13A	0.013629	-0.46173		ENSG00000146540	C7orf50	0.000219051	-0.472065		ENSG00000204149	AGAP6	0.0060011	0.396722		ENSG00000198034	RPS4X	0.0478674	-0.4301
ENSG00000133069	TMCC2	0.0255955	0.593198		ENSG00000118181	RPS25	0.00725127	-0.496723		ENSG00000232434	AJM1	0.0292617	-0.397229		ENSG00000135912	TTLL4	0.0441432	0.391064		ENSG00000149273	RPS3	0.0278445	-0.37886
ENSG00000232434	AJM1	0.0292617	-0.397229		ENSG00000198755	RPL10A	0.0159611	-0.399871		ENSG00000140400	MAN2C1	0.0124294	0.415113		ENSG00000014914	MTMR11	0.0155315	0.728457		ENSG00000162244	RPL29	0.0126893	-0.416131
ENSG00000065054	SLC9A3R2	0.00339661	0.556727		ENSG00000112306	RPS12	0.0385822	-0.385489		ENSG00000129968	ABHD17A	0.00303108	-0.413741		ENSG00000198520	ARMH1	0.0296071	0.434514		ENSG00000142541	RPL13A	0.013629	-0.46173
ENSG00000090097	PCBP4	0.00637035	-0.415311		ENSG00000146540	C7orf50	0.000219051	-0.472065		ENSG00000090097	PCBP4	0.00637035	-0.415311		ENSG00000002016	RAD52	0.00178922	0.435385		ENSG00000118181	RPS25	0.00725127	-0.496723
ENSG00000266714	MYO15B	0.00015269	0.872097		ENSG00000071082	RPL31	0.0117134	-0.507784		ENSG00000266714	MYO15B	0.00015269	0.872097		ENSG00000260853	AC109460.2	0.00399698	0.64073		ENSG00000198755	RPL10A	0.0159611	-0.399871
ENSG00000176485	PLAAT3	0.0116347	-0.400469		ENSG00000136942	RPL35	0.00534295	-0.51467		ENSG00000007264	MATK	0.00046488	-0.71864		ENSG00000263345	AC006435.2	0.003498	0.645963		ENSG00000112306	RPS12	0.0385822	-0.385489
ENSG00000102878	HSF4	0.00376895	0.686027		ENSG00000129968	ABHD17A	0.00303108	-0.413741		ENSG00000102878	HSF4	0.00376895	0.686027		ENSG00000120458	MSANTD2	0.000335241	0.422593		ENSG00000156482	RPL30	0.00737444	-0.546553
ENSG00000196123	KIAA0895L	0.00214385	0.688151		ENSG00000142676	RPL11	0.00275443	-0.534339		ENSG00000165458	INPPL1	0.00936341	0.437552							ENSG00000071082	RPL31	0.0117134	-0.507784
ENSG00000155368	DBI	0.00054691	-0.433457		ENSG00000219200	RNASEK	0.0390902	0.39341		ENSG00000021762	OSBPL5	0.0122312	-0.493476							ENSG00000136942	RPL35	0.00534295	-0.51467
ENSG00000165458	INPPL1	0.00936341	0.437552		ENSG00000225178	RPSAP58	0.0356953	-0.51122		ENSG00000103202	NME4	0.0185379	-0.466857							ENSG00000232187	FTH1P7	0.0268156	0.501304
ENSG00000236609	ZNF853	0.0348953	-0.445251		ENSG00000118680	MYL12B	0.00848	-0.389484		ENSG00000100429	HDAC10	0.015742	0.385109							ENSG00000142676	RPL11	0.00275443	-0.534339
ENSG00000140848	CPNE2	0.0196492	0.445943		ENSG00000126524	SBDS	0.0252435	-0.480044		ENSG00000127415	IDUA	0.0297125	0.386598							ENSG00000219200	RNASEK	0.0390902	0.39341
ENSG00000021762	OSBPL5	0.0122312	-0.493476		ENSG00000173915	ATP5MD	0.00238204	-0.454653		ENSG00000074855	ANO8	0.00288295	0.411633							ENSG00000118680	MYL12B	0.00848	-0.389484
ENSG00000127415	IDUA	0.0297125	0.386598		ENSG00000145425	RPS3A	0.0156111	-0.484268		ENSG00000196923	PDLIM7	0.00487794	0.455696							ENSG00000173915	ATP5MD	0.00238204	-0.454653
ENSG00000186815	TPCN1	0.0170309	0.492142		ENSG00000177954	RPS27	0.00321744	-0.6287		ENSG00000160113	NR2F6	0.000581985	0.608297							ENSG00000145425	RPS3A	0.0156111	-0.484268
ENSG00000074855	ANO8	0.00288295	0.411633		ENSG00000250067	YJEFN3	0.0153542	0.473204		ENSG00000099326	MZF1	0.00674198	0.38061							ENSG00000177954	RPS27	0.00321744	-0.6287
ENSG00000110721	CHKA	0.0060717	0.516017		ENSG00000114942	EEF1B2	0.0272392	-0.422309		ENSG00000231686	Z97180.1	0.00753798	0.442037							ENSG00000114942	EEF1B2	0.0272392	-0.422309
ENSG00000160113	NR2F6	0.000581985	0.608297		ENSG00000131469	RPL27	0.00544177	-0.525447		ENSG00000095066	HOOK2	0.000786641	0.533419							ENSG00000278771	RN7SL3	0.00875883	-0.893905
ENSG00000231686	Z97180.1	0.00753798	0.442037		ENSG00000127184	COX7C	0.005626	-0.517547		ENSG00000162572	SCNN1D	0.0230725	0.5395							ENSG00000131469	RPL27	0.00544177	-0.525447
ENSG00000113916	BCL6	0.0209639	0.574579		ENSG00000227063	RPL41P1	0.00927657	-0.528542		ENSG00000182871	COL18A1	0.0199006	0.683095							ENSG00000127184	COX7C	0.005626	-0.517547
ENSG00000134222	PSRC1	0.00794392	0.606002		ENSG00000279483	AC090498.1	0.0188438	-0.509851		ENSG00000167280	ENGASE	0.0393256	0.383345							ENSG00000198242	RPL23A	0.0034395	-0.502202
ENSG00000162572	SCNN1D	0.0230725	0.5395		ENSG00000114391	RPL24	0.00628386	-0.5505		ENSG00000237441	RGL2	0.0024471	0.442986							ENSG00000227063	RPL41P1	0.00927657	-0.528542
ENSG00000115255	REEP6	0.000660766	-0.602448		ENSG00000147604	RPL7	0.0144311	-0.499465		ENSG00000088881	EBF4	0.0177492	-0.424521							ENSG00000279483	AC090498.1	0.0188438	-0.509851
ENSG00000107551	RASSF4	0.038401	0.614558		ENSG00000229117	RPL41	0.00446054	-0.513004		ENSG00000167302	TEPSIN	0.00742872	0.384267							ENSG00000114391	RPL24	0.00628386	-0.5505
ENSG00000168209	DDIT4	0.00167289	-1.08232		ENSG00000007264	MATK	0.00046488	-0.71864		ENSG00000159674	SPON2	0.0107555	-0.781364							ENSG00000064601	CTSA	0.0108596	0.491294
ENSG00000167280	ENGASE	0.0393256	0.383345		ENSG00000116251	RPL22	0.0274769	-0.407328		ENSG00000064687	ABCA7	0.000212819	0.489781							ENSG00000161970	RPL26	0.0136848	-0.475043
ENSG00000109062	SLC9A3R1	0.00522659	-0.386235		ENSG00000169020	ATP5ME	0.0100822	-0.412908		ENSG00000160999	SH2B2	0.0340012	0.406							ENSG00000147604	RPL7	0.0144311	-0.499465
ENSG00000079277	MKNK1	0.000700862	0.515801		ENSG00000181163	NPM1	0.0181569	-0.384483		ENSG00000146828	SLC12A9	0.00906762	0.470372							ENSG00000229117	RPL41	0.00446054	-0.513004
ENSG00000164403	SHROOM1	0.00794944	1.19636		ENSG00000164587	RPS14	0.0076766	-0.486144		ENSG00000204859	ZBTB48	0.0140039	0.385789							ENSG00000116251	RPL22	0.0274769	-0.407328
ENSG00000237441	RGL2	0.0024471	0.442986		ENSG00000171863	RPS7	0.0200339	-0.430553		ENSG00000213199	ASIC3	0.0159774	0.395191							ENSG00000169020	ATP5ME	0.0100822	-0.412908
ENSG00000126822	PLEKHG3	0.00135257	-0.512224		ENSG00000125356	NDUFA1	0.0034406	-0.44974		ENSG00000197355	UAP1L1	0.00785517	0.693895							ENSG00000111906	HDDC2	0.000533427	-0.467994
ENSG00000088881	EBF4	0.0177492	-0.424521		ENSG00000109475	RPL34	0.0152878	-0.512057		ENSG00000142173	COL6A2	0.0338889	-0.565636							ENSG00000181163	NPM1	0.0181569	-0.384483
ENSG00000167302	TEPSIN	0.00742872	0.384267		ENSG00000144713	RPL32	0.0205568	-0.459596		ENSG00000129219	PLD2	0.033864	0.461282							ENSG00000164587	RPS14	0.0076766	-0.486144
ENSG00000064687	ABCA7	0.000212819	0.489781		ENSG00000264281	AC016596.2	0.0192517	-0.519421		ENSG00000186994	KANK3	0.000445605	-0.727676							ENSG00000171863	RPS7	0.0200339	-0.430553
ENSG00000117362	APH1A	0.000181107	-0.412004		ENSG00000236552	RPL13AP5	0.0388936	-0.391261		ENSG00000173442	EHBP1L1	0.0162511	0.380079							ENSG00000125356	NDUFA1	0.0034406	-0.44974
ENSG00000183401	CCDC159	0.0360388	0.434664		ENSG00000235552	RPL6P27	0.0254471	-0.410354		ENSG00000110719	TCIRG1	0.037925	0.384416							ENSG00000109475	RPL34	0.0152878	-0.512057
ENSG00000160999	SH2B2	0.0340012	0.406		ENSG00000171858	RPS21	0.00400321	-0.53182		ENSG00000051128	HOMER3	0.00574806	0.679178							ENSG00000144713	RPL32	0.0205568	-0.459596
ENSG00000146828	SLC12A9	0.00906762	0.470372		ENSG00000125743	SNRPD2	0.0046392	-0.431897		ENSG00000279382	AC018665.1	0.0255577	0.425285							ENSG00000264281	AC016596.2	0.0192517	-0.519421
ENSG00000128311	TST	0.0127242	0.382393		ENSG00000182774	RPS17	0.0342911	-0.380982		ENSG00000167701	GPT	0.0353561	0.475528							ENSG00000236552	RPL13AP5	0.0388936	-0.391261
ENSG00000135473	PAN2	0.000193514	0.539434		ENSG00000256393	RPL41P5	0.00238496	-0.591101		ENSG00000179588	ZFPM1	0.00214561	-0.595918							ENSG00000235552	RPL6P27	0.0254471	-0.410354
ENSG00000204859	ZBTB48	0.0140039	0.385789		ENSG00000174917	MICOS13	0.00234876	-0.386565		ENSG00000281490	CICP14	0.0231722	0.409318							ENSG00000182899	RPL35A	0.00247539	-0.551956
ENSG00000117616	RSRP1	0.00181881	0.385763		ENSG00000137970	RPL7P9	0.0473594	-0.454527		ENSG00000181444	ZNF467	0.00926506	0.850319							ENSG00000171858	RPS21	0.00400321	-0.53182
ENSG00000197355	UAP1L1	0.00785517	0.693895		ENSG00000244313	AC024293.1	0.0486121	-0.498993		ENSG00000142102	PGGHG	0.0412446	0.442929							ENSG00000125743	SNRPD2	0.0046392	-0.431897
ENSG00000129219	PLD2	0.033864	0.461282		ENSG00000105202	FBL	0.0122316	-0.384156		ENSG00000225697	SLC26A6	0.000786829	0.574783							ENSG00000182774	RPS17	0.0342911	-0.380982
ENSG00000139631	CSAD	0.00117125	0.58859		ENSG00000167775	CD320	0.0206964	-0.397436		ENSG00000074660	SCARF1	0.0095524	0.886355							ENSG00000256393	RPL41P5	0.00238496	-0.591101
ENSG00000180739	S1PR5	0.00180827	-0.861543		ENSG00000169750	RAC3	0.0190443	0.477311		ENSG00000173531	MST1	0.00656485	0.387987							ENSG00000008988	RPS20	0.0214236	-0.459029
ENSG00000186994	KANK3	0.000445605	-0.727676		ENSG00000213178	RPL22P1	0.044179	-0.422726		ENSG00000060138	YBX3	0.000477648	0.629944							ENSG00000174917	MICOS13	0.00234876	-0.386565
ENSG00000169715	MT1E	0.0327944	-0.649171		ENSG00000010295	IFFO1	0.0308565	0.420497												ENSG00000137970	RPL7P9	0.0473594	-0.454527
ENSG00000110719	TCIRG1	0.037925	0.384416		ENSG00000197756	RPL37A	0.00326955	-0.485582												ENSG00000163682	RPL9	0.0474138	-0.591727
ENSG00000143842	SOX13	0.00271956	-0.634835		ENSG00000178464	RPL10P16	0.0206353	-0.401881												ENSG00000244313	AC024293.1	0.0486121	-0.498993
ENSG00000119139	TJP2	0.000124078	0.487726		ENSG00000214485	RPL7P1	0.0155549	-0.464197												ENSG00000105202	FBL	0.0122316	-0.384156
ENSG00000168899	VAMP5	0.014057	-0.410814		ENSG00000224631	RPS27AP16	0.0167062	-0.555871												ENSG00000158062	UBXN11	0.0377419	0.557174
ENSG00000230715	AC018638.2	0.00419947	0.498148		ENSG00000165502	RPL36AL	0.00272569	-0.423224												ENSG00000167775	CD320	0.0206964	-0.397436
ENSG00000279382	AC018665.1	0.0255577	0.425285		ENSG00000185641	AC034236.1	0.010376	-0.522894												ENSG00000125691	RPL23	0.0158505	-0.434387
ENSG00000176953	NFATC2IP	0.000497248	0.449609		ENSG00000244398	AC116533.1	0.00773638	-0.55605												ENSG00000213178	RPL22P1	0.044179	-0.422726
ENSG00000162496	DHRS3	0.00927034	-0.477252		ENSG00000245910	SNHG6	0.0125262	-0.457285												ENSG00000198918	RPL39	0.0101005	-0.503768
ENSG00000167701	GPT	0.0353561	0.475528		ENSG00000263266	RPS7P1	0.0267115	-0.421478												ENSG00000233913	RPL10P9	0.0387849	-0.578312
ENSG00000152518	ZFP36L2	0.00814015	-0.53958		ENSG00000237506	RPSAP15	0.0152816	-1.75751												ENSG00000197756	RPL37A	0.00326955	-0.485582
ENSG00000243302	AC018638.4	0.0292926	0.382556		ENSG00000213741	RPS29	0.000965153	-0.822923												ENSG00000112695	COX7A2	0.00186047	-0.482672
ENSG00000197162	ZNF785	0.00485769	0.478428		ENSG00000235174	RPL39P3	0.011091	-0.481315												ENSG00000139239	RPL14P1	0.010727	-0.438308
ENSG00000179588	ZFPM1	0.00214561	-0.595918		ENSG00000236439	AC099336.2	0.0351393	-0.481421												ENSG00000178464	RPL10P16	0.0206353	-0.401881
ENSG00000281490	CICP14	0.0231722	0.409318		ENSG00000227081	AC005912.1	0.0177473	-0.601135												ENSG00000214485	RPL7P1	0.0155549	-0.464197
ENSG00000141736	ERBB2	0.0424714	-0.446857		ENSG00000277972	CISD3	7.09088e-05	-0.552702												ENSG00000224631	RPS27AP16	0.0167062	-0.555871
ENSG00000164530	PI16	0.00532069	0.658399		ENSG00000170310	STX8	1.25203e-05	-0.533336												ENSG00000242299	AC073861.1	0.00507238	-0.554204
ENSG00000106565	TMEM176B	0.0130599	1.27217		ENSG00000224858	RPL29P11	0.0374124	-0.42629												ENSG00000165502	RPL36AL	0.00272569	-0.423224
ENSG00000167065	DUSP18	0.021054	0.433385		ENSG00000126756	UXT	0.00516706	-0.402518												ENSG00000185641	AC034236.1	0.010376	-0.522894
ENSG00000095383	TBC1D2	0.0438124	0.549891		ENSG00000181524	RPL24P4	0.00336831	-0.568811												ENSG00000122026	RPL21	0.0319598	-0.464329
ENSG00000142102	PGGHG	0.0412446	0.442929		ENSG00000163170	BOLA3	0.0219292	-0.397669												ENSG00000244398	AC116533.1	0.00773638	-0.55605
ENSG00000002933	TMEM176A	0.00763547	1.4174		ENSG00000220749	RPL21P28	0.0293836	-0.740723												ENSG00000171476	HOPX	0.00292311	-0.776656
ENSG00000135912	TTLL4	0.0441432	0.391064		ENSG00000146677	AC004453.1	0.0081401	-0.588472												ENSG00000166441	RPL27A	0.00346248	-0.433412
ENSG00000149782	PLCB3	0.0331905	0.483779		ENSG00000230383	AC009245.1	0.0177887	-0.463294												ENSG00000196683	TOMM7	0.0360744	-0.454585
ENSG00000198520	ARMH1	0.0296071	0.434514		ENSG00000180992	MRPL14	0.000975388	-0.41844												ENSG00000245910	SNHG6	0.0125262	-0.457285
ENSG00000135362	PRR5L	0.0098663	-0.588908		ENSG00000164182	NDUFAF2	0.00344898	-0.442284												ENSG00000263266	RPS7P1	0.0267115	-0.421478
ENSG00000225697	SLC26A6	0.000786829	0.574783		ENSG00000175701	MTLN	0.0194808	-0.405787												ENSG00000134419	RPS15A	0.0409042	-0.421321
ENSG00000122547	EEPD1	0.0245976	0.459322		ENSG00000240376	AC010343.1	0.00198962	-0.641685												ENSG00000084072	PPIE	0.00530852	-0.466835
ENSG00000225194	LINC00092	0.00863483	-0.423563		ENSG00000253683	AC027309.2	0.00332263	-0.380914												ENSG00000237506	RPSAP15	0.0152816	-1.75751
ENSG00000002016	RAD52	0.00178922	0.435385		ENSG00000234287	AC099560.2	0.0349387	-0.558535												ENSG00000213741	RPS29	0.000965153	-0.822923
ENSG00000173531	MST1	0.00656485	0.387987		ENSG00000132432	SEC61G	0.00880578	-0.388797												ENSG00000235174	RPL39P3	0.011091	-0.481315
ENSG00000260853	AC109460.2	0.00399698	0.64073		ENSG00000213326	RPS7P11	0.0282652	-0.422074												ENSG00000236439	AC099336.2	0.0351393	-0.481421
ENSG00000075234	TTC38	0.0153912	-0.520236		ENSG00000124172	ATP5F1E	0.0136962	-0.457052												ENSG00000227081	AC005912.1	0.0177473	-0.601135
ENSG00000133321	PLAAT4	0.00474794	-0.402754		ENSG00000226360	RPL10AP6	0.0442704	-0.389377												ENSG00000170310	STX8	1.25203e-05	-0.533336
ENSG00000100504	PYGL	0.0158605	0.43083		ENSG00000240204	SMKR1	0.00670391	-0.518905												ENSG00000224858	RPL29P11	0.0374124	-0.42629
ENSG00000240065	PSMB9	2.87883e-05	-0.522202		ENSG00000236801	RPL24P8	0.013096	-0.550633												ENSG00000126756	UXT	0.00516706	-0.402518
ENSG00000115129	TP53I3	0.00756537	0.66507																	ENSG00000181524	RPL24P4	0.00336831	-0.568811
																				ENSG00000169715	MT1E	0.0327944	-0.649171
																				ENSG00000121851	POLR3GL	0.00172486	-0.391399
																				ENSG00000220749	RPL21P28	0.0293836	-0.740723
																				ENSG00000146677	AC004453.1	0.0081401	-0.588472
																				ENSG00000234964	FABP5P7	0.0282657	-0.475808
																				ENSG00000230383	AC009245.1	0.0177887	-0.463294
																				ENSG00000180992	MRPL14	0.000975388	-0.41844
																				ENSG00000164182	NDUFAF2	0.00344898	-0.442284
																				ENSG00000175701	MTLN	0.0194808	-0.405787
																				ENSG00000240376	AC010343.1	0.00198962	-0.641685
																				ENSG00000212664	AC064799.1	0.031955	-0.585393
																				ENSG00000100319	ZMAT5	0.00170614	-0.457027
																				ENSG00000168899	VAMP5	0.014057	-0.410814
																				ENSG00000253683	AC027309.2	0.00332263	-0.380914
																				ENSG00000234287	AC099560.2	0.0349387	-0.558535
																				ENSG00000090263	MRPS33	0.00252284	-0.382392
																				ENSG00000132432	SEC61G	0.00880578	-0.388797
																				ENSG00000176209	SMIM19	0.000922181	-0.415048
																				ENSG00000213326	RPS7P11	0.0282652	-0.422074
																				ENSG00000124172	ATP5F1E	0.0136962	-0.457052
																				ENSG00000203667	COX20	0.00173425	0.449872
																				ENSG00000162385	MAGOH	0.00110939	-0.389611
																				ENSG00000182004	SNRPE	0.00213707	-0.454707
																				ENSG00000170860	LSM3	0.0010759	-0.505012
																				ENSG00000226360	RPL10AP6	0.0442704	-0.389377
																				ENSG00000113810	SMC4	0.000768903	0.632921
																				ENSG00000240204	SMKR1	0.00670391	-0.518905
																				ENSG00000240036	AC104563.1	0.0380466	-0.490302
																				ENSG00000268996	MAN1B1-DT	0.00010375	-0.522227
																				ENSG00000233270	SNRPEP4	0.000151078	-0.670595
																				ENSG00000236801	RPL24P8	0.013096	-0.550633
																				ENSG00000234171	RNASEH1-AS1	0.00659429	-0.465877
																				ENSG00000234268	AP000936.3	0.0336441	-0.683812
																				ENSG00000187118	CMC1	0.00135579	-0.825388
																				ENSG00000145220	LYAR	3.78977e-05	-0.611291

## Sheet: Sup. table S7
Results of IPA functional enrichment analysis
Clusters	Ingenuity Canonical Pathways	-log(B-H p-value)	Ratio	Molecules
DLPFC-blue	Phospholipases	1.82	0.0678	PLAAT3,PLAAT4,PLCB3,PLD2
DLPFC-brown	eIF2 Signaling	35.8	0.127	RPL10A,RPL11,RPL13A,RPL22,RPL24,RPL27,RPL31,RPL32,RPL34,RPL35,RPL36AL,RPL37A,RPL41,RPL6,RPL7,RPS11,RPS12,RPS14,RPS17,RPS18,RPS21,RPS25,RPS27,RPS29,RPS3A,RPS4X,RPS7
	mTOR Signaling	12.4	0.0644	RPS11,RPS12,RPS14,RPS17,RPS18,RPS21,RPS25,RAC3,RPS27,RPS29,RPS3A,RPS4X,RPS7
	Regulation of eIF4 and p70S6K Signaling	12.4	0.0784	RPS11,RPS12,RPS14,RPS17,RPS18,RPS21,RPS25,RPS27,RPS29,RPS3A,RPS4X,RPS7
	Mitochondrial Dysfunction	2.67	0.0303	ATP5F1E,ATP5ME,COX7C,NDUFA1,NDUFAF2
	Oxidative Phosphorylation	2.46	0.0385	ATP5F1E,ATP5ME,COX7C,NDUFA1
AnCg-pink	Phosphatidylethanolamine Biosynthesis II	2.2	0.125	CHKA
	Phosphatidylcholine Biosynthesis I	2.2	0.143	CHKA
	DNA Double-Strand Break Repair by Homologous Recombination	2.13	0.0714	RAD52
nAcc-turquoise	EIF2 Signaling	59.7	0.198	RPL10A,RPL11,RPL13A,RPL21,RPL22,RPL23,RPL23A,RPL24,RPL26,RPL27,RPL27A,RPL29,RPL3,RPL30,RPL31,RPL32,RPL34,RPL35,RPL35A,RPL36AL,RPL37A,RPL39,RPL41,RPL6,RPL7,RPL9,RPS11,RPS12,RPS14,RPS15A,RPS17,RPS18,RPS20,RPS21,RPS25,RPS27,RPS29,RPS3,RPS3A,RPS4X,RPS5,RPS7
	Regulation of eIF4 and p70S6K Signaling	16.5	0.105	RPS11,RPS12,RPS14,RPS15A,RPS17,RPS18,RPS20,RPS21,RPS25,RPS27,RPS29,RPS3,RPS3A,RPS4X,RPS5,RPS7
	mTOR Signaling	14.7	0.0792	RPS11,RPS12,RPS14,RPS15A,RPS17,RPS18,RPS20,RPS21,RPS25,RPS27,RPS29,RPS3,RPS3A,RPS4X,RPS5,RPS7
	Mitochondrial Dysfunction	3.29	0.0364	ATP5F1E,ATP5ME,COX7A2,COX7C,NDUFA1,NDUFAF2
	Oxidative Phosphorylation	3.29	0.0481	ATP5F1E,ATP5ME,COX7A2,COX7C,NDUFA1
